# Supplementary material for: Palladium-catalyzed hydroformylation of terminal arylacetylenes with glyoxylic acid
Source: Royal Society of Chemistry journal article supplement (doi:10.1039/c7cc09629a), 2018-01-01

## Supporting Information

*for*

### **Palladium-Catalyzed Hydroformylation of Terminal Arylacetylenes with Glyoxylic Acid**

Yang Liu, Liangzhen Cai\*, Sheng Xu\*, Weiwen Pu and Xiaochun Tao\*

*School of Chemistry & Molecular Engineering, East China University of Science  
and Technology, 130 Mei Long Road, Shanghai 200237, China.*

#### **CONTENTS**

|                                                                                                 |    |
|-------------------------------------------------------------------------------------------------|----|
| 1. General Information and Catalytic Experiments.....                                           | 2  |
| 2. Characterizations of $\alpha,\beta$ -unsaturated aldehydes Products.....                     | 5  |
| 3. $^1\text{H}$ NMR, $^{13}\text{C}$ NMR of $\alpha,\beta$ -unsaturated aldehydes Products..... | 11 |
| 4. $^1\text{H}$ NMR of Deuterium-Labeling experiments .....                                     | 32 |

## 1. General Information and Catalytic Experiments

### 1.1. General information.

All reagents and solvents were purchased from commercial sources and used without further purification. Most arylacetylenes were bought by commodity resource, and Compounds (**1h**, **1i**, **1g**, **1r**) was synthesized according to the reported literature (S. S. Ichake, A. Konala, V. Kavala, C. W. Kuo and C. F. Yao, *Org Lett*, 2017, **19**, 54-57).<sup>1</sup> Compound spots were visualized by UV light (254nm). Column chromatography was performed on silica gel FCP 200-300. NMR spectra were recorded by using a Bruker 400 MHz spectrometer. Chemical shifts in <sup>1</sup>H-NMR are reported in parts per million (ppm) relative to residual chloroform (7.26ppm), multiplicities were indicated by using abbreviations (s = singlet; d = doublet; t = triplet; m = multiplet). Coupling constants are expressed in Hertz (Hz). <sup>13</sup>C-NMR chemical shifts are reported in ppm relative to the central peak of chloroform (77.16ppm) as internal standards. Mass spectra were recorded on the HP-5989 instrument by EI/ESI methods.

### 1.2. General Procedure for Palladium catalyzed hydroformylation of arylacetylenes.

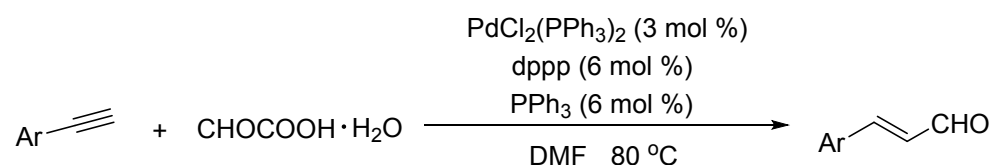

Standard reaction condition: The terminal alkyne (2mmol) was dissolved in DMF (4ml) in a 25ml Schlenk tube. Then PdCl<sub>2</sub>(PPh<sub>3</sub>)<sub>2</sub> (0.042g, 0.06mmol), dppp (0.049g, 0.12mmol), PPh<sub>3</sub> (0.031g, 0.12mmol) and glyoxylic acid monohydrate (0.92g, 10mmol) were added in one batch, and the resulting solution was intensively stirred under an argon atmosphere at 80 °C for 2-4 hours, and then the mixture was poured into saturated aqueous NaHCO<sub>3</sub> solution (25ml) and extracted with CH<sub>2</sub>Cl<sub>2</sub> (4 × 15ml),

The combined organic layers were washed with brine (4 × 20ml), dried over MgSO<sub>4</sub>, filtered, and concentrated, the residue was purified by flash chromatography on silica gel to obtain the desired product by using light petroleum ether/ethyl acetate (15:1) as the eluent.

### 1.3. General Procedure for Deuterium-Labeling experiments.

Preparation of CHOCOOD: The  $\text{CHOCOOH}\cdot\text{H}_2\text{O}$  (0.45g) was dissolved in 5ml  $\text{D}_2\text{O}$ . Then the solution was dried with  $\text{P}_2\text{O}_5$  at 50 °C to 0.45g.

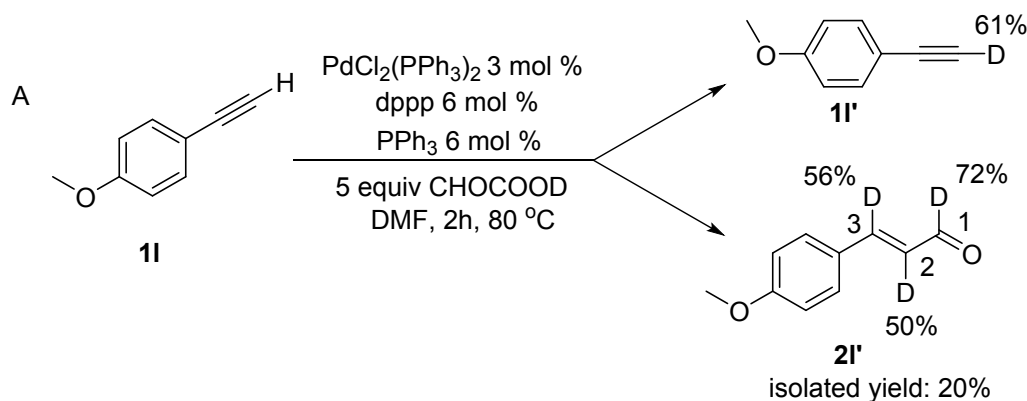

Reaction A: The  $\text{CHOCOOD}$  (0.9g) was dissolved in DMF (4ml) and was added in a 25ml Schlenk tube. Then 1-ethynyl-4-methoxybenzene (0.264g, 2mmol),  $\text{PdCl}_2(\text{PPh}_3)_2$  (0.042g, 0.06mmol),  $\text{dppp}$  (0.050g, 0.12mmol),  $\text{PPh}_3$  (0.030g, 0.12mmol) were added in one batch, and the resulting solution was intensively stirred under an argon atmosphere at 80 °C for 2 hours, and then the mixture was poured into saturated aqueous  $\text{NaHCO}_3$  solution (25ml) and extracted with  $\text{CH}_2\text{Cl}_2$  (4 x 15ml),

The combined organic layers were washed with brine (4 x 20ml), dried over  $\text{MgSO}_4$ , filtered, and concentrated, the residue was purified by flash chromatography on silica gel to obtain the desired product by using light petroleum ether/ethyl acetate (from 100:1 to 15:1) as the eluent. The isolated yield of aldehyde product was 0.062g (20%).

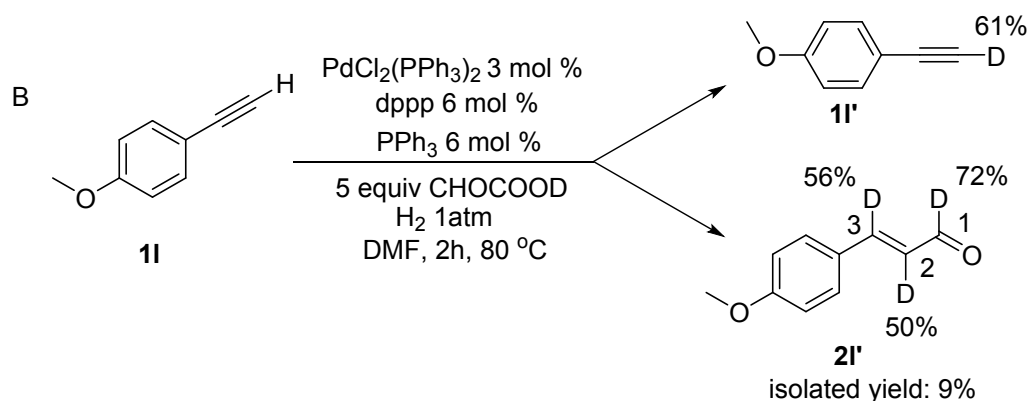

Reaction B: The CHOCOOD (0.9g) was dissolved in DMF (4ml) and was added in a 25ml Schlenk tube. Then 1-ethynyl-4-methoxybenzene (0.264g, 1mmol),  $\text{PdCl}_2(\text{PPh}_3)_2$  (0.042g, 0.06mmol), dppp (0.050g, 0.12mmol),  $\text{PPh}_3$  (0.030g, 0.12mmol) were added in one batch, and the resulting solution was intensively stirred under an  $\text{H}_2$  atmosphere (1atm) at 80 °C for 2 hours, and then the mixture was poured into saturated aqueous  $\text{NaHCO}_3$  solution (25ml) and extracted with  $\text{CH}_2\text{Cl}_2$  (4 × 15ml), The combined organic layers were washed with brine (4 × 20ml), dried over  $\text{MgSO}_4$ , filtered, and concentrated, the residue was purified by flash chromatography on silica gel to obtain the desired product by using light petroleum ether/ethyl acetate (from 100:1 to 15:1) as the eluent. The isolated yield of aldehyde product was 0.029g (9%).

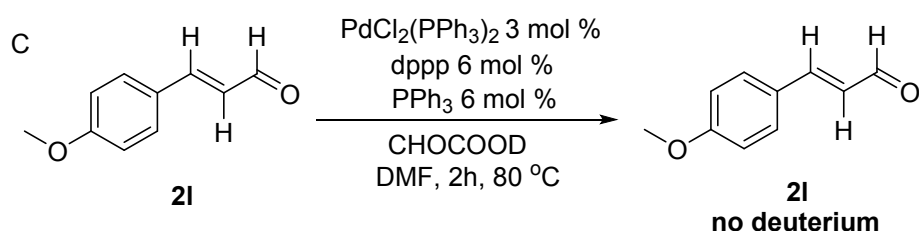

Reaction C: The CHOCOOD (0.45g) was dissolved in DMF (2ml) and was added in a 25ml Schlenk tube. Then (E)-3-(4-methoxyphenyl)acrylaldehyde (0.162g, 1mmol),  $\text{PdCl}_2(\text{PPh}_3)_2$  (0.021g, 0.03mmol), dppp (0.025g, 0.06mmol),  $\text{PPh}_3$  (0.015g, 0.06mmol) were added in one batch, and the resulting solution was intensively stirred under an argon atmosphere at 80 °C for 2 hours, and then the mixture was poured into saturated aqueous  $\text{NaHCO}_3$  solution (25ml) and extracted with  $\text{CH}_2\text{Cl}_2$  (4 × 15ml), The combined organic layers were washed with brine (4 × 20ml), dried over  $\text{MgSO}_4$ , filtered, and concentrated, the residue was purified by flash chromatography on silica gel to obtain the desired product by using light petroleum ether/ethyl acetate (15:1) as the eluent. The isolated yield of aldehyde product was 99%.

## 2. Characterizations of $\alpha,\beta$ -unsaturated aldehydes Products

**2a: cinnamaldehyde.** The title compound was prepared according to the general

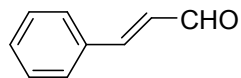

procedure after silica gel chromatography (PE: EA = 15:1) and the yield was 72%, light yellow oil.  $^1\text{H}$  NMR (400 MHz,  $\text{CDCl}_3$ )  $\delta$  9.71 (d,  $J$  = 7.7 Hz, 1H), 7.61 – 7.54 (m, 2H), 7.48 (d,  $J$  = 16.0 Hz, 1H),

7.44 (m, 3H), 6.72 (dd,  $J$  = 16.0, 7.7 Hz, 1H).  $^{13}\text{C}$  NMR (101 MHz,  $\text{CDCl}_3$ )  $\delta$  193.82, 152.91, 134.09, 131.39, 129.21, 128.69, 128.60.

This NMR analysis is consistent with the literature.<sup>2</sup>

**2b: (E)-3-(p-tolyl)acrylaldehyde.** The title compound was prepared according to the

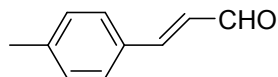

general procedure after silica gel chromatography (PE: EA = 15:1) and the yield was 63%, light yellow solid.  $^1\text{H}$  NMR (400 MHz,  $\text{CDCl}_3$ )  $\delta$  9.67 (d,  $J$  = 7.7 Hz, 1H), 7.46 (d,  $J$  = 7.9 Hz, 2H),

7.44 (d,  $J$  = 15.9 Hz, 1H), 7.23 (d,  $J$  = 7.9 Hz, 2H), 6.67 (dd,  $J$  = 15.9, 7.7 Hz, 1H).  $^{13}\text{C}$  NMR (101 MHz,  $\text{CDCl}_3$ )  $\delta$  193.88, 153.04, 142.06, 131.40, 129.93, 128.62, 127.79, 21.67.

This NMR analysis is consistent with the literature.<sup>3</sup>

**2c: (E)-3-(m-tolyl)acrylaldehyde.** The title compound was prepared according to the

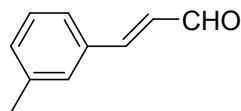

general procedure after silica gel chromatography (PE: EA = 15:1) and the yield was 56%, light yellow oil.  $^1\text{H}$  NMR (400 MHz,  $\text{CDCl}_3$ )  $\delta$  9.69 (d,  $J$  = 7.7 Hz, 1H), 7.45 (d,  $J$  = 15.9 Hz, 1H),

7.37 (m, 3H), 7.32 (t,  $J$  = 7.7 Hz, 1H), 7.27 – 7.24 (d,  $J$  = 7.7 Hz, 1H), 6.71 (dd,  $J$  = 15.9, 7.7 Hz, 1H), 2.35 (s, 3H).  $^{13}\text{C}$  NMR (101 MHz,  $\text{CDCl}_3$ )  $\delta$  193.86, 153.16, 138.85, 133.96, 132.17, 129.14, 129.00, 128.42, 125.75, 21.32.

This NMR analysis is consistent with the literature.<sup>3</sup>

**2d: (E)-3-(o-tolyl)acrylaldehyde.** The title compound was prepared according to the

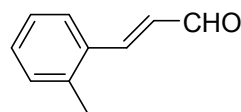

general procedure after silica gel chromatography (PE: EA = 15:1) and the yield was 51%, light yellow oil.  $^1\text{H}$  NMR (400 MHz,  $\text{CDCl}_3$ )  $\delta$  9.73 (d,  $J$  = 7.7 Hz, 1H), 7.78 (d,  $J$  = 15.9 Hz, 1H),

7.62 – 7.56 (m, 1H), 7.33 (m, 1H), 7.25 (m, 2H), 6.67 (dd,  $J$  = 15.9, 7.7 Hz, 1H), 2.48 (s, 3H).  $^{13}\text{C}$  NMR (101 MHz,  $\text{CDCl}_3$ )  $\delta$  193.99, 150.40, 138.04, 132.91, 131.18, 131.14, 129.69, 126.93, 126.71, 19.87.

This NMR analysis is consistent with the literature.<sup>3</sup>

**2e: (E)-3-(4-chlorophenyl)acrylaldehyde.** The title compound was prepared

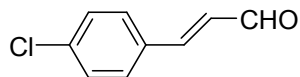

according to the general procedure after silica gel chromatography (PE: EA = 15:1) and the yield was 45%, yellow solid.  $^1\text{H}$  NMR (400 MHz,  $\text{CDCl}_3$ )  $\delta$  9.70 (d,  $J$  =

7.6 Hz, 1H), 7.40 – 7.46 (m, 2H), 7.43 (d,  $J = 16$  Hz, 1H), 7.31 – 7.35 (m, 2H), 6.68 (dd,  $J = 16.0$ , 7.6 Hz, 1H).  $^{13}\text{C}$  NMR (101 MHz,  $\text{CDCl}_3$ )  $\delta$  193.49, 151.17, 137.37, 132.59, 129.73, 129.53, 129.04.

This NMR analysis is consistent with the literature.<sup>2</sup>

**2f: (E)-3-(2-chlorophenyl)acrylaldehyde.** The title compound was prepared

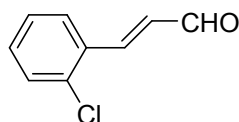

according to the general procedure after silica gel chromatography (PE: EA = 15:1) and the yield was 64%, yellow oil.  $^1\text{H}$  NMR (400 MHz,  $\text{CDCl}_3$ )  $\delta$  9.75 (d,  $J = 7.7$  Hz, 1H), 7.93 (d,  $J = 16.0$  Hz, 1H), 7.66 (dd,  $J = 7.8$ , 2 Hz, 1H), 7.46 (dd,  $J = 7.8$ , 2 Hz, 1H), 7.36 (td,  $J = 7.8$ , 2.0 Hz, 1H), 7.32 (td,  $J = 7.8$ , 2 Hz, 1H), 6.70 (dd,  $J = 16.0$ , 7.7 Hz, 1H).  $^{13}\text{C}$  NMR (101 MHz,  $\text{CDCl}_3$ )  $\delta$  193.71, 148.11, 135.32, 132.19, 132.12, 130.63, 130.47, 127.96, 127.43.

This NMR analysis is consistent with the literature.<sup>2</sup>

**2g: (E)-3-(4-bromophenyl)acrylaldehyde.** The title compound was prepared

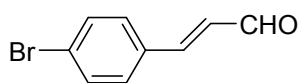

according to the general procedure after silica gel chromatography (PE: EA = 15:1) and the yield was 52%, yellow solid.  $^1\text{H}$  NMR (400 MHz,  $\text{CDCl}_3$ )  $\delta$  9.69 (d,  $J = 7.6$  Hz, 1H), 7.46 – 7.52 (m, 2H), 7.41 (d,  $J = 16$  Hz, 1H), 7.37 – 7.44 (m, 2H), 6.68 (dd,  $J = 16.0$ , 7.6 Hz, 1H).  $^{13}\text{C}$  NMR (101 MHz,  $\text{CDCl}_3$ )  $\delta$  193.45, 151.19, 132.98, 132.47, 129.87, 129.08, 125.76.

This NMR analysis is consistent with the literature.<sup>2</sup>

**2h: (E)-3-(naphthalen-2-yl)acrylaldehyde.** The title compound was prepared

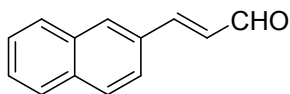

according to the general procedure after silica gel chromatography (PE: EA = 15:1) and the yield was 64%, yellow solid.  $^1\text{H}$  NMR (400 MHz,  $\text{CDCl}_3$ )  $\delta$  9.76 (d,  $J = 7.7$  Hz, 1H), 7.98 (s, 1H), 7.87 (m, 3H), 7.72 – 7.50 (m, 4H), 6.83 (dd,  $J = 15.9$ , 7.7 Hz, 1H).  $^{13}\text{C}$  NMR (101 MHz,  $\text{CDCl}_3$ )  $\delta$  193.82, 152.91, 134.74, 133.30, 131.65, 130.82, 129.09, 128.88, 128.80, 127.98, 127.94, 127.08, 123.63.

This NMR analysis is consistent with the literature.<sup>4</sup>

**2i: (E)-3-(naphthalen-1-yl)acrylaldehyde.** The title compound was prepared

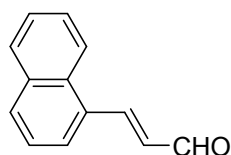

according to the general procedure after silica gel chromatography (PE: EA = 15:1) and the yield was 72%, yellow solid.  $^1\text{H}$  NMR (400 MHz,  $\text{CDCl}_3$ )  $\delta$  9.85 (d,  $J = 7.7$  Hz, 1H), 8.32 (d,  $J = 15.7$  Hz, 1H), 8.24 – 8.16 (m, 1H), 8.02 – 7.88 (m,

2H), 7.85 – 7.78 (m, 1H), 7.67 – 7.44 (m, 2H), 6.84 (dd,  $J = 15.7, 7.7$  Hz, 1H).  $^{13}\text{C}$  NMR (101 MHz,  $\text{CDCl}_3$ )  $\delta$  193.84, 149.48, 133.85, 131.75, 131.29, 131.03, 130.97, 129.10, 127.39, 126.54, 125.84, 125.59, 122.88.

This NMR analysis is consistent with the literature.<sup>3</sup>

**2j: (E)-3-([1,1'-biphenyl]-4-yl)acrylaldehyde.** The title compound was prepared

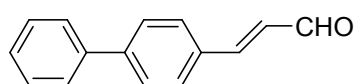

according to the general procedure after silica gel chromatography (PE: EA = 15:1) and the yield was 62%, yellow solid.  $^1\text{H}$  NMR (400 MHz,  $\text{CDCl}_3$ )  $\delta$  9.73 (d,  $J =$

7.7 Hz, 1H), 7.71 – 7.59 (m, 6H), 7.51 (d,  $J = 15.9$  Hz, 1H), 7.49 – 7.36 (m, 3H), 6.76 (dd,  $J = 15.9, 7.7$  Hz, 1H).  $^{13}\text{C}$  NMR (101 MHz,  $\text{CDCl}_3$ )  $\delta$  193.76, 152.38, 144.09, 139.92, 133.01, 129.12, 129.06, 128.47, 128.20, 127.78, 127.15.

This NMR analysis is consistent with the literature.<sup>3</sup>

**2k: (E)-3-(4-fluorophenyl)acrylaldehyde.** The title compound was prepared

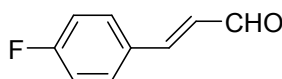

according to the general procedure after silica gel chromatography (PE: EA = 15:1) and the yield was 63%, light yellow oil.  $^1\text{H}$  NMR (400 MHz,  $\text{CDCl}_3$ )  $\delta$  9.69 (d,  $J =$

7.7 Hz, 1H), 7.61 – 7.53 (m, 2H), 7.44 (d,  $J = 16.0$  Hz, 1H), 7.17 – 7.08 (m, 2H), 6.65 (dd,  $J = 16.0, 7.7$  Hz, 1H).  $^{13}\text{C}$  NMR (101 MHz,  $\text{CDCl}_3$ )  $\delta$  193.57, 164.54 (d,  $J = 253.2$  Hz), 151.45, 130.61 (d,  $J = 8.7$  Hz), 130.41 (d,  $J = 3.4$  Hz), 128.47 (d,  $J = 2.3$  Hz), 116.48 (d,  $J = 22.0$  Hz).

This NMR analysis is consistent with the literature.<sup>2</sup>

**2l: (E)-3-(4-methoxyphenyl)acrylaldehyde.** The title compound was prepared

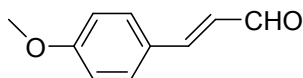

according to the general procedure after silica gel chromatography (PE: EA = 15:1) and the yield was 61%, yellow solid.  $^1\text{H}$  NMR (400 MHz,  $\text{CDCl}_3$ )  $\delta$  9.63 (d,  $J = 7.7$

Hz, 1H), 7.48 – 7.52 (m, 2H), 7.40 (d,  $J = 15.8$  Hz, 1H), 6.90 – 6.94 (m, 2H), 6.59 (dd,  $J = 15.8, 7.7$  Hz, 1H).  $^{13}\text{C}$  NMR (101 MHz,  $\text{CDCl}_3$ )  $\delta$  193.75, 162.25, 152.80, 130.41, 126.81, 126.54, 114.62, 55.51.

This NMR analysis is consistent with the literature.<sup>4</sup>

**2m: (E)-3-(2-methoxyphenyl)acrylaldehyde.** The title compound was prepared

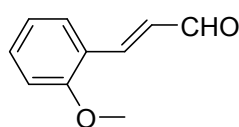

according to the general procedure after silica gel chromatography (PE: EA = 15:1) and the yield was 82%, yellow solid.  $^1\text{H}$  NMR (400 MHz,  $\text{CDCl}_3$ )  $\delta$  9.69 (d,  $J = 7.9$  Hz, 1H), 7.84 (d,  $J = 16.1$  Hz, 1H), 7.55 (dd,  $J = 7.7, 1.7$  Hz, 1H), 7.41

(ddd,  $J = 8.4, 7.4, 1.7$  Hz, 1H), 7.00 (ddd,  $J = 7.4, 7.7, 1.1$  Hz, 1H), 6.95 (dd,  $J = 8.4, 1.1$  Hz, 1H), 6.80 (dd,  $J = 16.1, 7.9$  Hz, 1H), 3.92 (s, 3H).  $^{13}\text{C}$  NMR (101 MHz,  $\text{CDCl}_3$ )  $\delta$  194.76, 158.43, 148.39, 132.83, 129.23, 129.02, 123.11, 121.02, 111.42, 55.71.

This NMR analysis is consistent with the literature.<sup>5</sup>

**2n: (E)-N-(3-(3-oxoprop-1-en-1-yl)phenyl)acetamide.** The title compound was

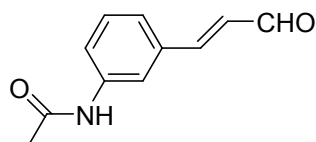

prepared according to the general procedure after silica gel chromatography (PE: EA = 5:1) and the yield was 73%, white solid, *mp.* 178-179 °C.  $^1\text{H}$  NMR (400 MHz,  $\text{CDCl}_3$ )  $\delta$  9.67 (dd,  $J = 7.7, 1.0$  Hz, 1H), 7.87 (s, 1H), 7.83 (t,  $J = 2.0$  Hz, 1H), 7.55 (d,  $J = 7.8$  Hz, 1H), 7.43 (d,  $J = 16.0$  Hz, 1H), 7.36 (t,  $J = 7.8$  Hz, 1H), 7.29 (d,  $J = 7.8$  Hz, 1H), 6.68 (dd,  $J = 16.0, 7.7$  Hz, 1H), 2.20 (s, 3H).  $^{13}\text{C}$  NMR (101 MHz,  $\text{CDCl}_3$ )  $\delta$  193.96, 169.01, 152.82, 139.00, 134.83, 129.78, 128.97, 124.33, 122.64, 119.72, 24.67. HRMS (ESI):  $m/z$   $[\text{M}+\text{H}]^+$  calculated for  $\text{C}_{11}\text{H}_{11}\text{NO}_2$ : 190.0868; found: 190.0867.

**2o: (E)-N-(4-(3-oxoprop-1-en-1-yl)phenyl)acetamide.** The title compound was

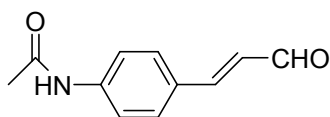

prepared according to the general procedure after silica gel chromatography (PE: EA = 5:1) and the yield was 63%, white solid, *mp.* 167-170 °C.  $^1\text{H}$  NMR (400 MHz,  $\text{CDCl}_3$ )  $\delta$  9.68 (d,  $J = 7.7$  Hz, 1H), 7.61 (d,  $J = 8.5$  Hz, 2H), 7.53 (d,  $J = 8.7$  Hz, 2H), 7.45 (s, 1H), 7.43 (d,  $J = 15.9$  Hz, 1H), 6.65 (dd,  $J = 15.9, 7.7$  Hz, 1H).  $^{13}\text{C}$  NMR (101 MHz,  $\text{CDCl}_3$ )  $\delta$  193.85, 168.56, 152.32, 140.81, 129.90, 129.74, 127.68, 119.81, 24.93. HRMS (ESI):  $m/z$   $[\text{M}+\text{H}]^+$  calculated for  $\text{C}_{11}\text{H}_{11}\text{NO}_2$ : 190.0868; found: 190.0867.

**2p: (E)-3-(4-(tert-butyl)phenyl)acrylaldehyde.** The title compound was prepared

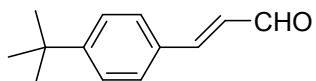

according to the general procedure after silica gel chromatography (PE: EA = 15:1) and the yield was 67%, yellow solid.  $^1\text{H}$  NMR (400 MHz,  $\text{CDCl}_3$ )  $\delta$  9.69 (d,  $J = 7.8$  Hz, 1H), 7.48 – 7.54 (m, 2H), 7.47 (d,  $J = 15.9$  Hz, 1H), 7.44 – 7.48 (m, 2H), 6.70 (dd,  $J = 15.9, 7.8$  Hz, 1H).  $^{13}\text{C}$  NMR (101 MHz,  $\text{CDCl}_3$ )  $\delta$  193.98, 155.21, 152.97, 131.41, 128.54, 128.02, 126.24, 35.16, 31.24.

This NMR analysis is consistent with the literature.<sup>4</sup>

**2q: (E)-3-(5-methylthiophen-2-yl)acrylaldehyde.** The title compound was prepared according to the general procedure after silica gel chromatography (PE: EA = 15:1)



and the yield was 60%, yellow oil. <sup>1</sup>H NMR (400 MHz, CDCl<sub>3</sub>) δ 9.57 (d, *J* = 7.7 Hz, 1H), 7.49 (d, *J* = 15.5 Hz, 1H), 7.16 (d, *J* = 3.6 Hz, 1H), 6.77 (d, *J* = 3.6 Hz, 1H), 6.38 (dd, *J* = 15.5, 7.7 Hz, 1H), 2.52 (s, 3H). <sup>13</sup>C NMR (101 MHz, CDCl<sub>3</sub>) δ 193.07, 146.54, 145.06, 137.44, 133.12, 127.20, 126.27, 16.08. HRMS (ESI): *m/z* [M+H]<sup>+</sup> calculated for C<sub>8</sub>H<sub>8</sub>OS: 153.0374; found: 153.0376.

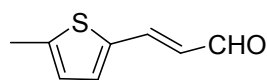

**2r: (E)-3-(3-methylthiophen-2-yl)acrylaldehyde.** The title compound was prepared according to the general procedure after silica gel chromatography (PE: EA = 15:1) and the yield was 52%, yellow oil. <sup>1</sup>H NMR (400 MHz, CDCl<sub>3</sub>) δ 9.62 (d, *J* = 7.6 Hz, 1H), 7.63 (d, *J* = 15.5 Hz, 1H), 7.38 (d, *J* = 5.1 Hz, 1H), 6.92 (d, *J* = 5.1 Hz, 1H), 6.45 (dd, *J* = 15.5, 7.6 Hz, 1H), 2.39 (s, 3H). <sup>13</sup>C NMR (101 MHz, CDCl<sub>3</sub>) δ 193.15, 142.98, 142.92, 133.70, 131.63, 129.13, 126.65, 14.42. HRMS (ESI): *m/z* [M+H]<sup>+</sup> calculated for C<sub>8</sub>H<sub>8</sub>OS: 153.0374; found: 153.0375.

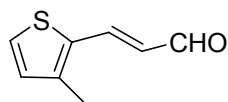

**2s: (E)-3-(4-(trifluoromethyl)phenyl)acrylaldehyde.** The title compound was prepared according to the general procedure after silica gel chromatography (PE: EA = 10:1) and the yield was 45%, light yellow oil. <sup>1</sup>H NMR (400 MHz, CDCl<sub>3</sub>) δ 9.75 (d, *J* = 7.5 Hz, 1H), 7.68 (m, 4H), 7.51 (d, *J* = 16.0 Hz, 1H), 6.77 (dd, *J* = 16.0, 7.5 Hz, 1H). <sup>13</sup>C NMR (101 MHz, CDCl<sub>3</sub>) δ 193.33, 150.43, 137.42, 132.70 (q, *J* = 32.8 Hz), 130.62, 128.70, 126.19 (q, *J* = 3.8 Hz), 123.79 (q, *J* = 272.5 Hz). This NMR analysis is consistent with the literature.<sup>2</sup>

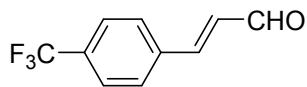

**2t: methyl (E)-4-(3-oxoprop-1-en-1-yl)benzoate.** The title compound was prepared according to the general procedure after silica gel chromatography (PE: EA = 5:1) and the yield was 42%, white solid. <sup>1</sup>H NMR (400 MHz, CDCl<sub>3</sub>) δ 9.74 (d, *J* = 7.4 Hz, 1H), 8.09 (d, *J* = 7.6 Hz, 2H), 7.63 (d, *J* = 7.6 Hz, 2H), 7.50 (d, *J* = 16.0 Hz, 1H), 6.78 (dd, *J* = 16.0, 7.4 Hz, 1H), 3.94 (s, 3H). <sup>13</sup>C NMR (101 MHz, CDCl<sub>3</sub>) δ 193.47, 166.37, 151.02, 138.18, 132.32, 130.48, 130.38, 128.43, 52.54. This NMR analysis is consistent with the literature.<sup>2</sup>

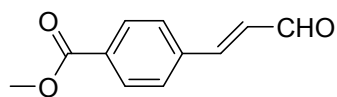

**2u: (E)-4-(3-oxoprop-1-en-1-yl)benzonitrile.** The title compound was prepared according to the general procedure after silica gel chromatography (PE: EA = 5:1) and the yield was 36%, white solid. <sup>1</sup>H NMR (400 MHz, CDCl<sub>3</sub>) δ 9.76 (d, *J* = 7.5 Hz, 1H), 7.73 (d, *J* = 8.4 Hz, 2H), 7.66 (d, *J* = 8.4 Hz, 2H), 7.48 (d, *J* = 16.0 Hz, 1H), 6.77

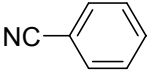
 (dd,  $J = 16.0, 7.5$  Hz, 1H).  $^{13}\text{C}$  NMR (101 MHz,  $\text{CDCl}_3$ )  $\delta$  193.03, 149.59, 138.27, 132.95, 131.31, 128.86, 118.26, 114.41.

This NMR analysis is consistent with the literature.<sup>3</sup>

**21'**:  $^1\text{H}$  NMR (400 MHz,  $\text{CDCl}_3$ )  $\delta$  9.63 (m, 0.12H), 7.48 – 7.52 (m, 2H), 7.40 (m, 0.23H), 6.90 – 6.94 (m, 2H), 6.59 (m, 0.23H). HRMS (ESI):  $m/z$   $[\text{M}]^+$  calculated for  $\text{C}_{10}\text{H}_9\text{DO}_2$ : 163.0744; found: 163.0728.  $[\text{M}]^+$  calculated for  $\text{C}_{10}\text{H}_8\text{D}_2\text{O}_2$ : 164.0806; found: 164.0805.  $[\text{M}]^+$  calculated for  $\text{C}_{10}\text{H}_7\text{D}_3\text{O}_2$ : 165.0869; found: 165.0871.

## Reference

1. S. S. Ichake, A. Konala, V. Kavala, C. W. Kuo and C. F. Yao, *Org Lett*, 2017, **19**, 54-57.
2. H. Huang, C. Yu, X. Li, Y. Zhang, Y. Zhang, X. Chen, P. S. Mariano, H. Xie and W. Wang, *Angew.Chem.Int.Ed.*, 2017, **56**, 8201-8205.
3. J. Liu, J. Zhu, H. Jiang, W. Wang and J. Li, *Chem. Commun.*, 2010, 46, 415-417.
4. H. Chen, H. Jiang, C. Cai, J. Dong and W. Fu, *Org. Lett.*, 2011, **13**, 992-994.
5. J.-A. Jiang, J.-L. Du, Z.-G. Wang, Z.-N. Zhang, X. Xu, G.-L. Zheng and Y.-F. Ji, *Tetrahedron Lett.*, 2014, **55**, 1677-1681.

### 3. $^1\text{H}$ NMR, $^{13}\text{C}$ NMR of $\alpha,\beta$ -unsaturated aldehydes Products

**2a:** cinnamaldehyde.

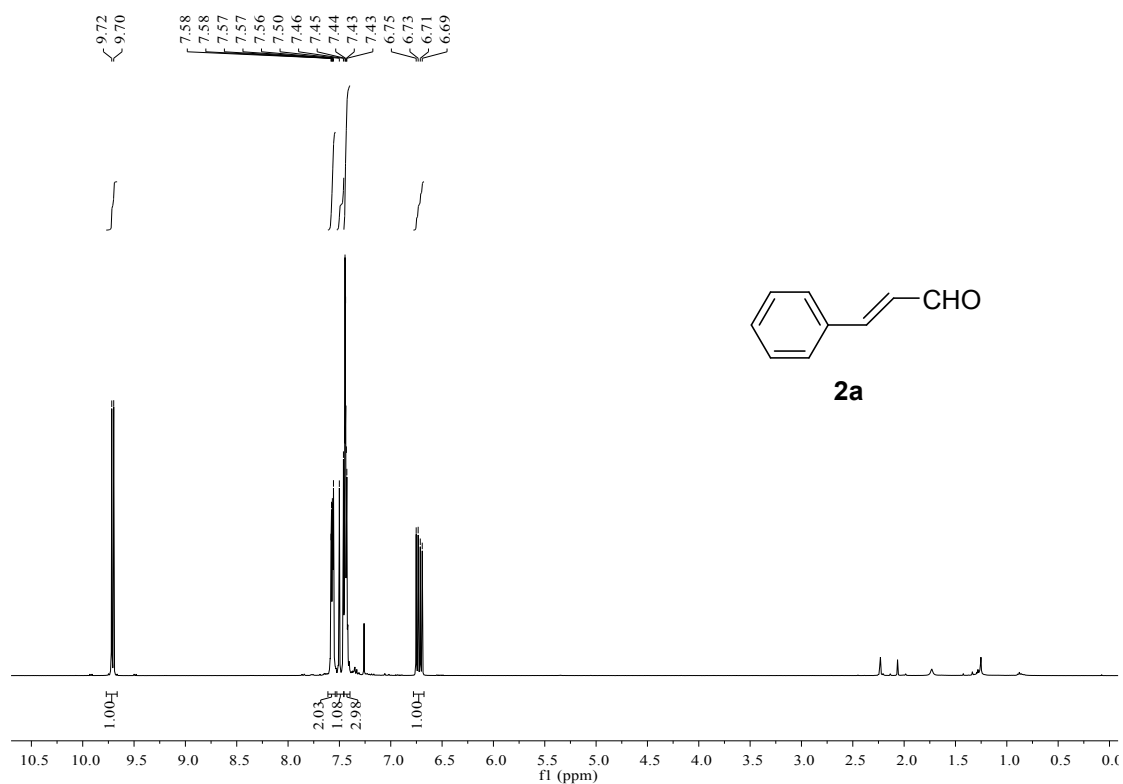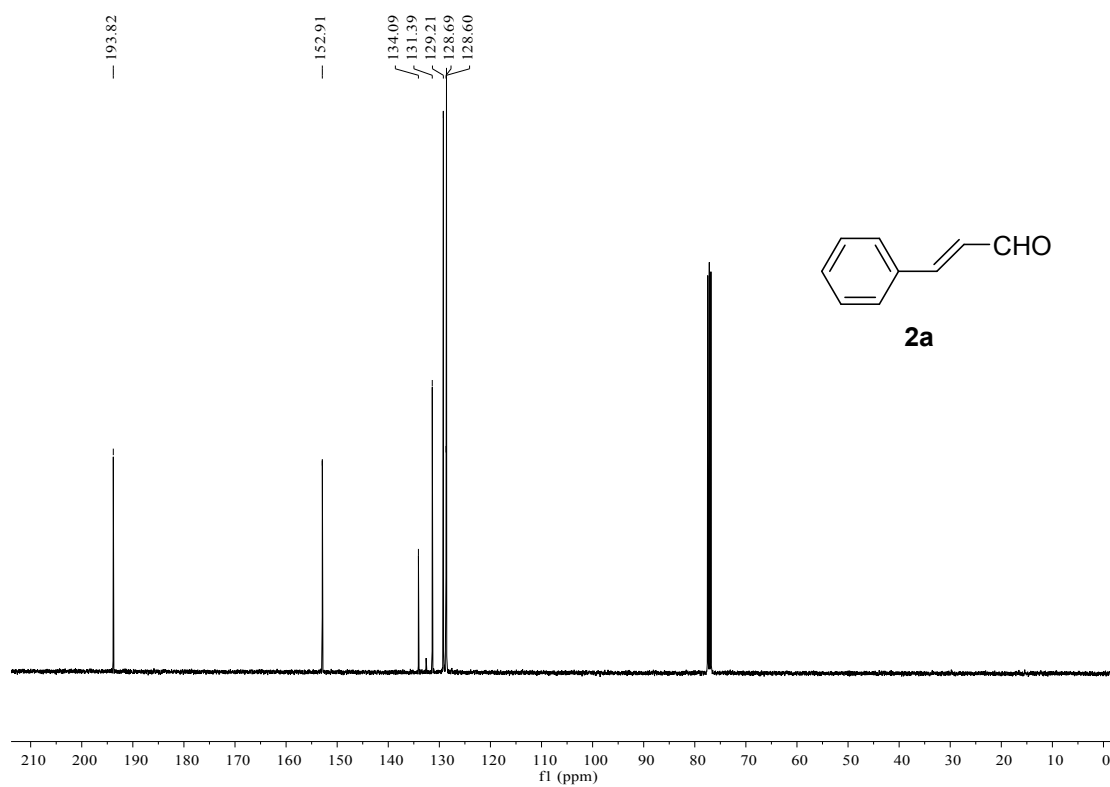

**2b: (E)-3-(p-tolyl)acrylaldehyde.**

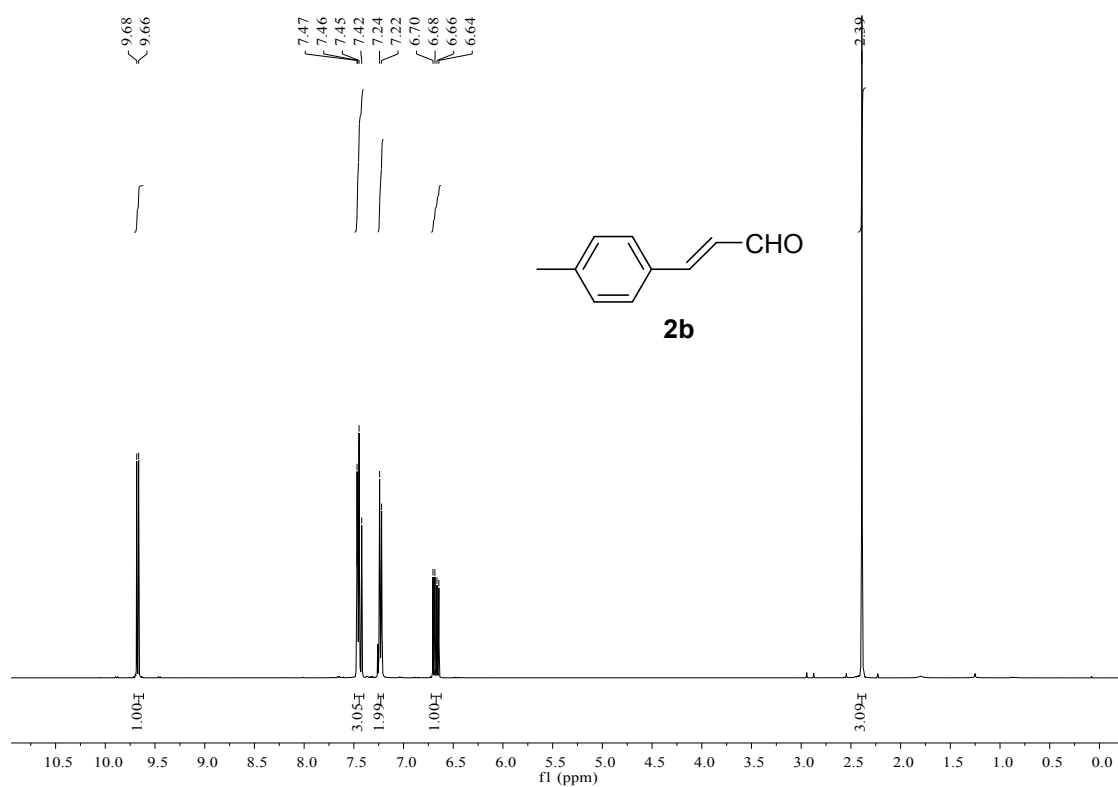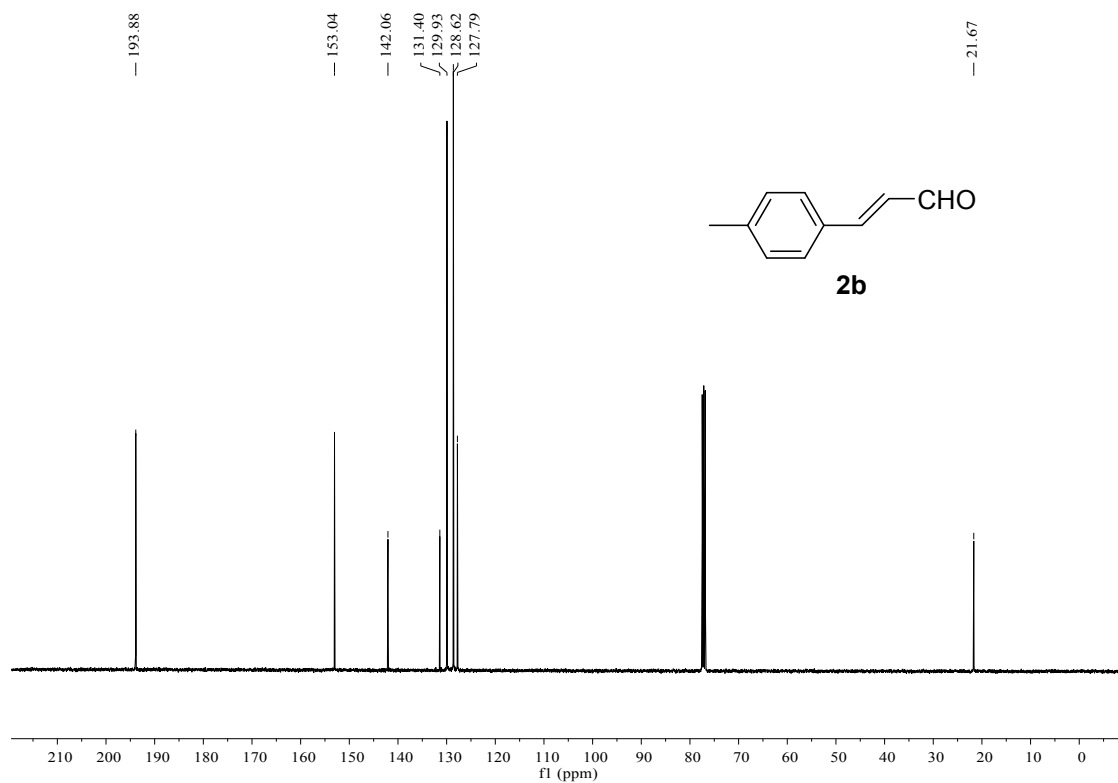

**2c: (E)-3-(m-tolyl)acrylaldehyde.**

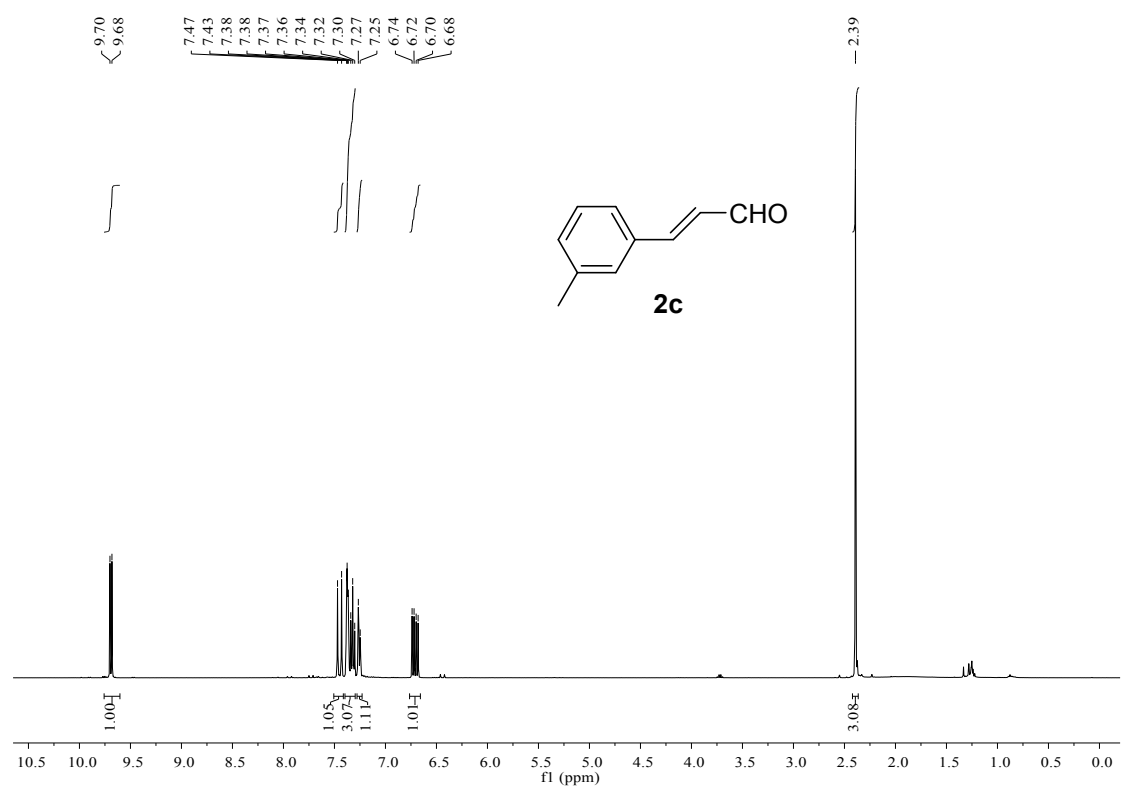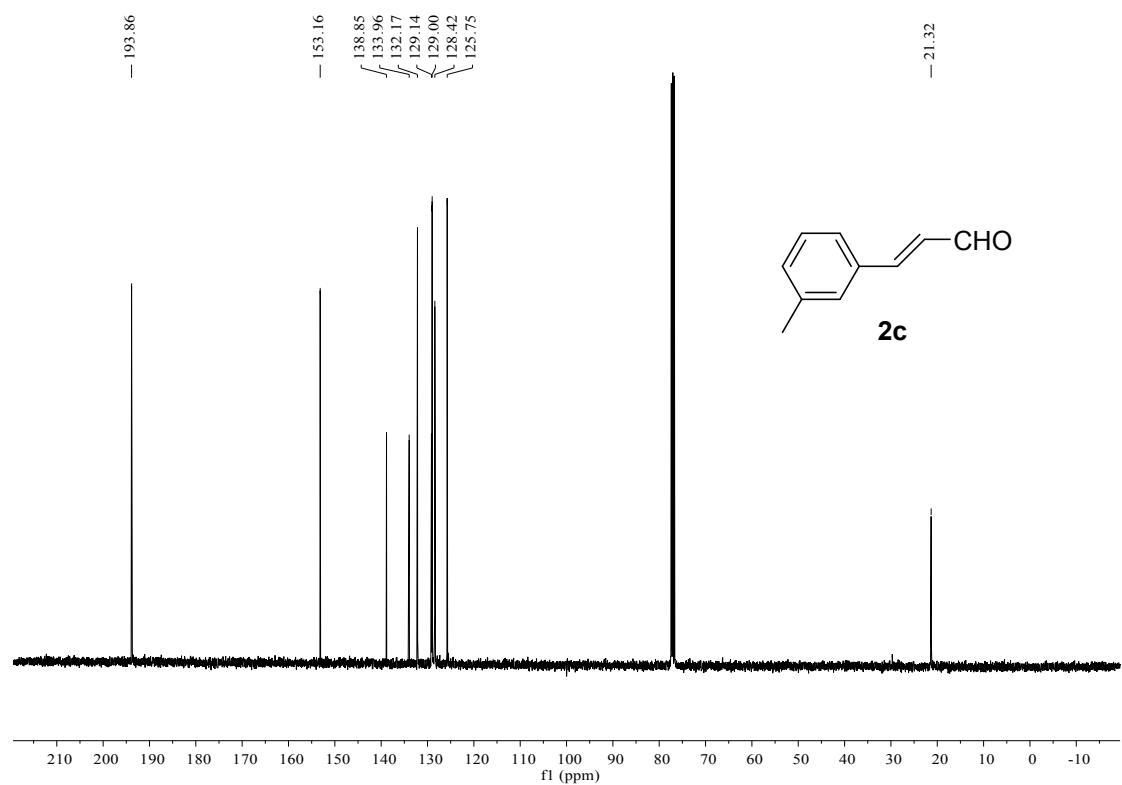

**2d: (E)-3-(o-tolyl)acrylaldehyde.**

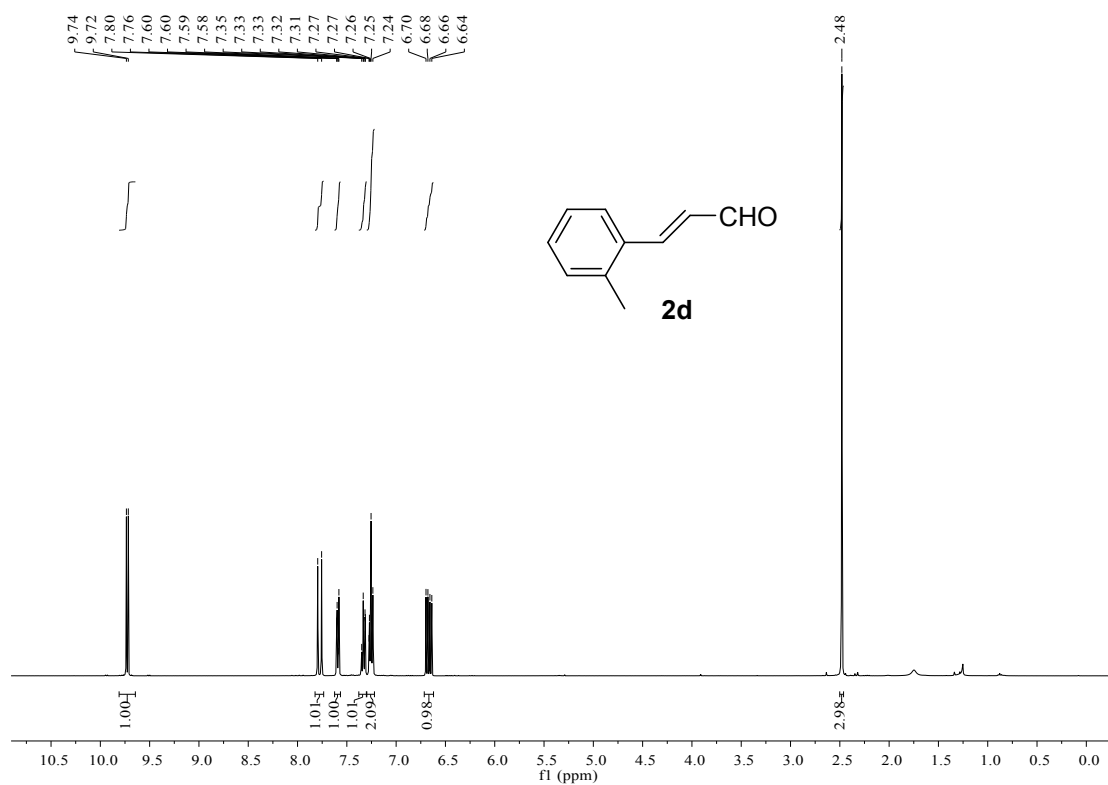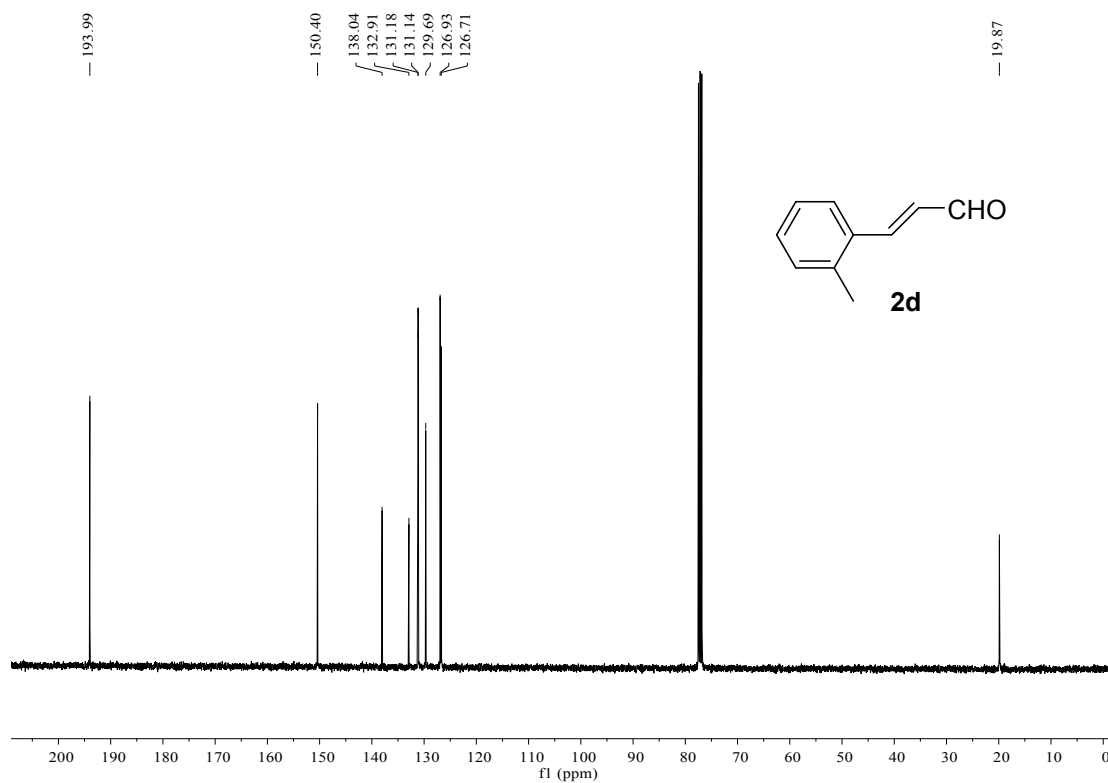

**2e: (E)-3-(4-chlorophenyl)acrylaldehyde.**

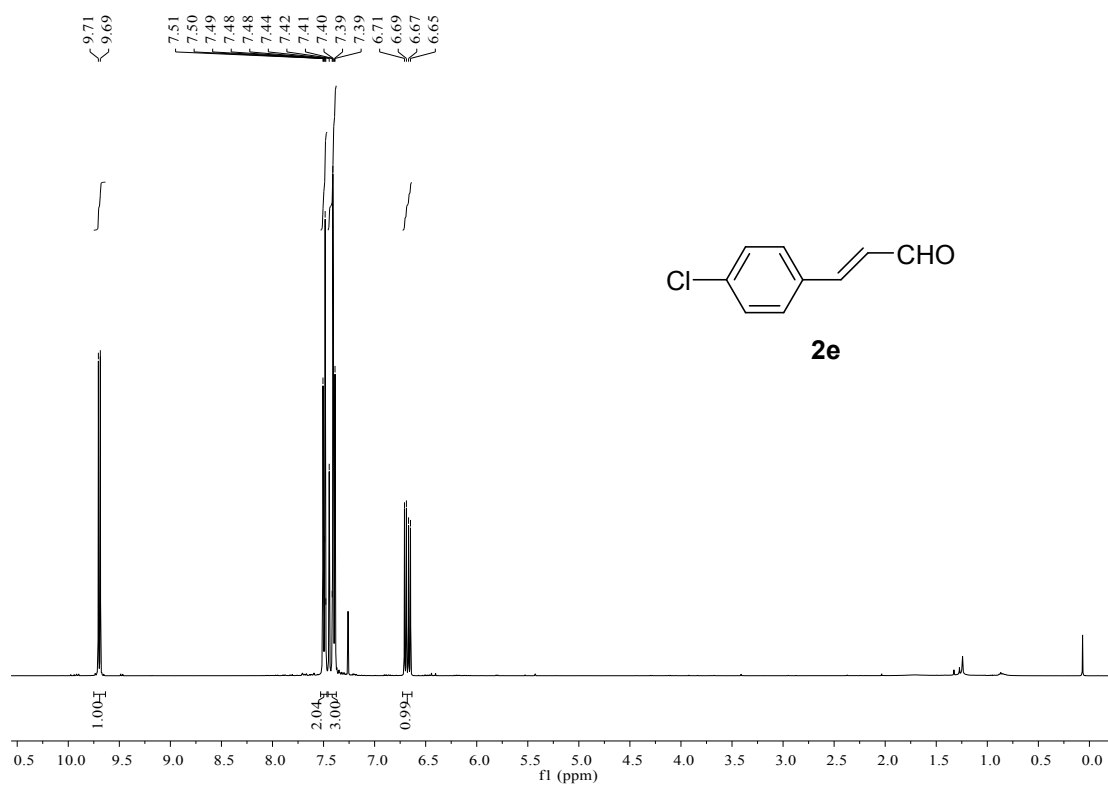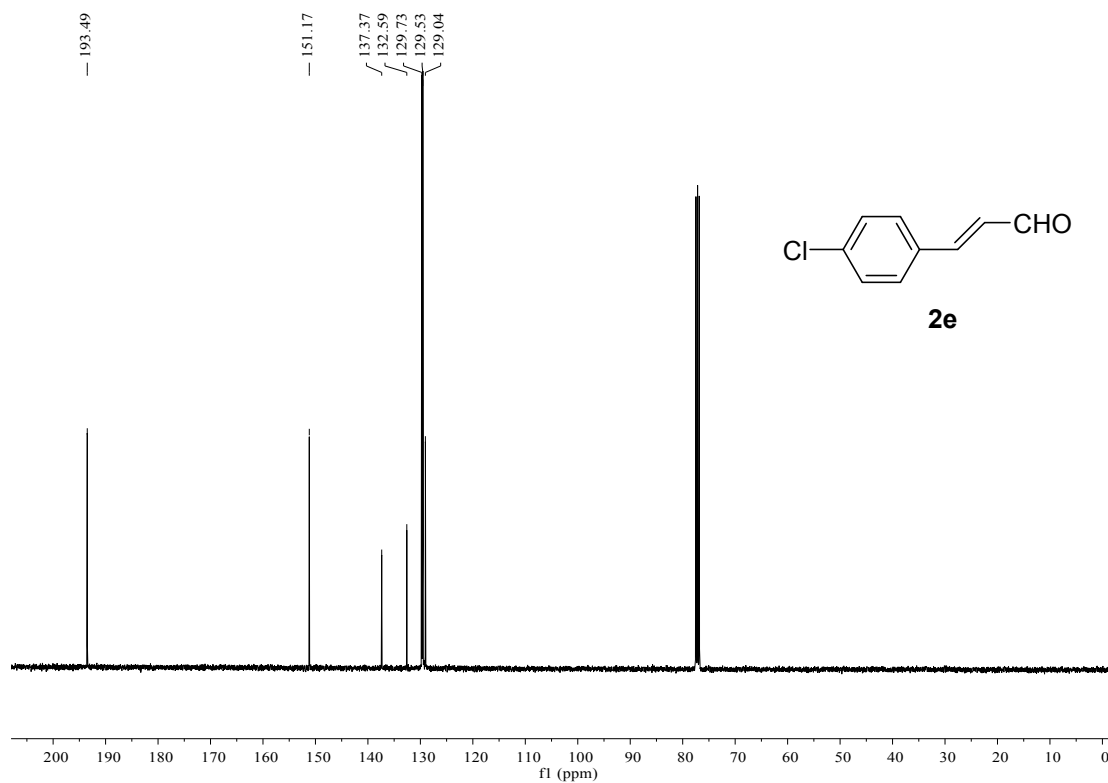

**2f: (E)-3-(2-chlorophenyl)acrylaldehyde.**

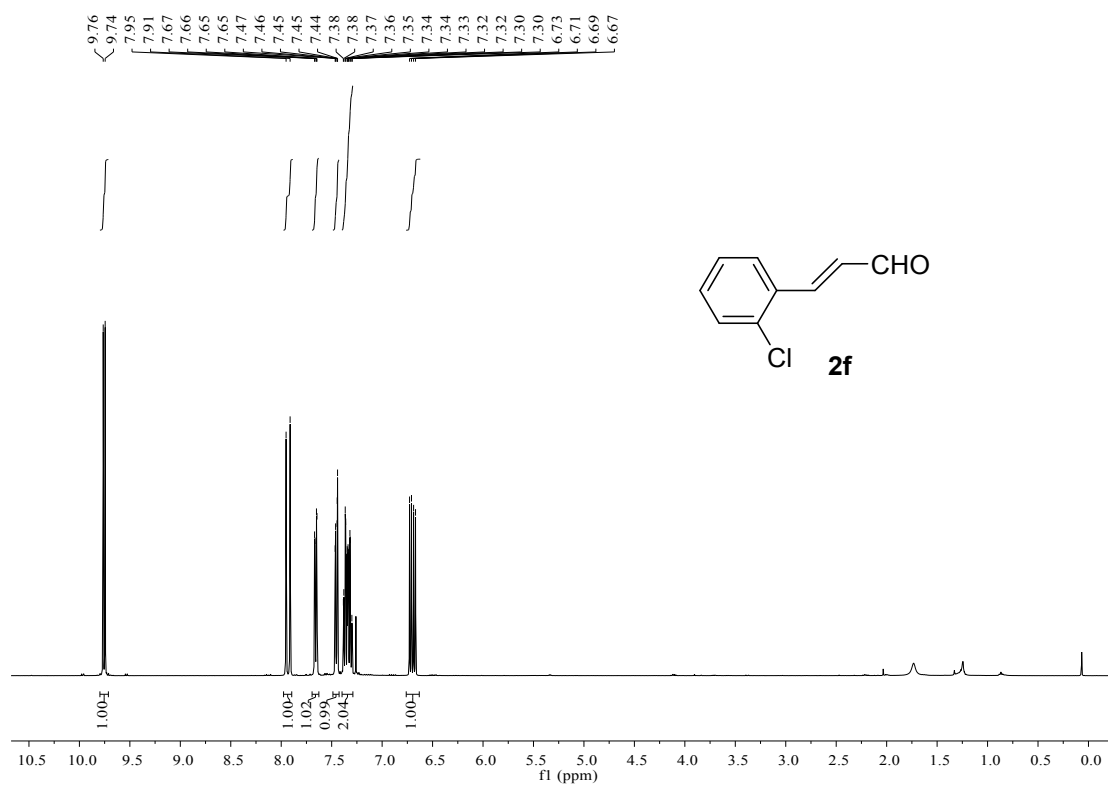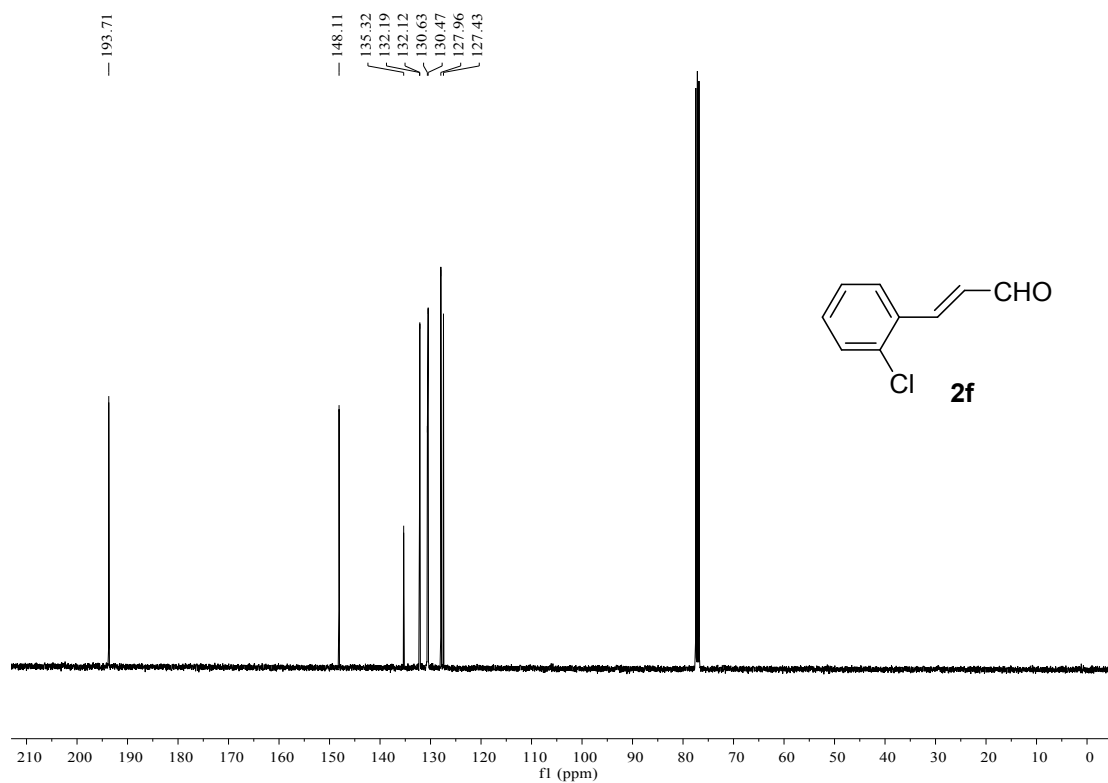



**2g: (E)-3-(4-bromophenyl)acrylaldehyde.**

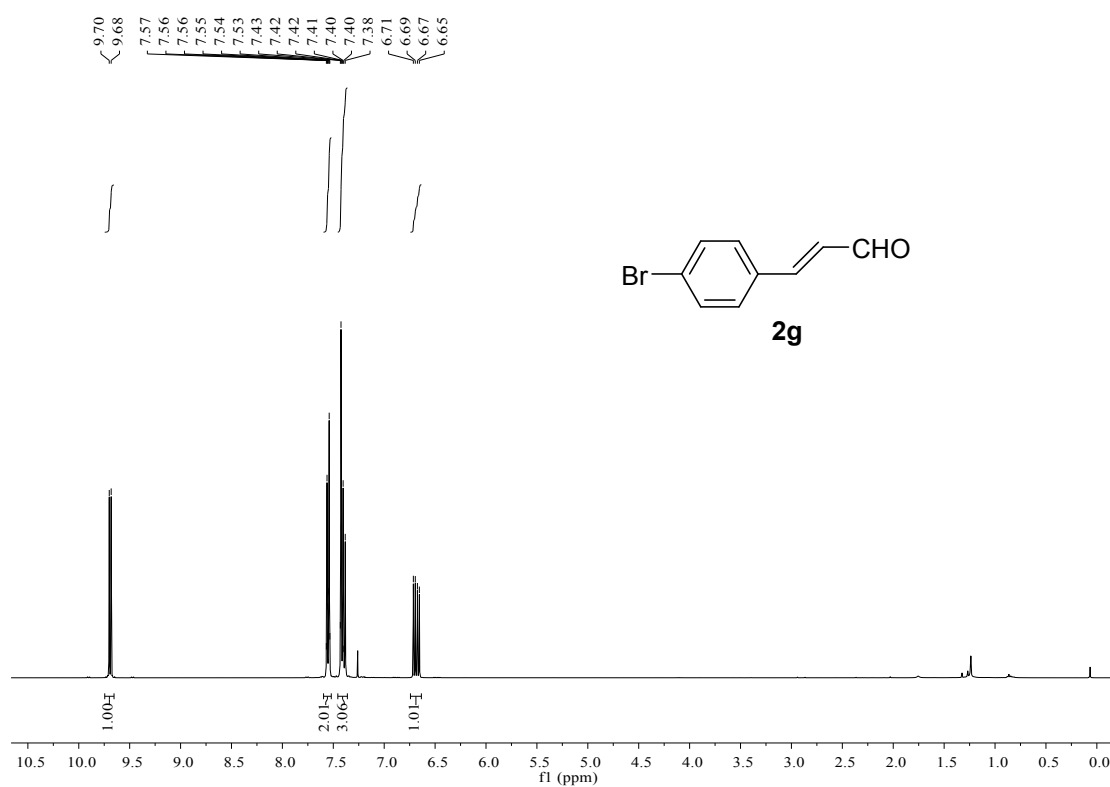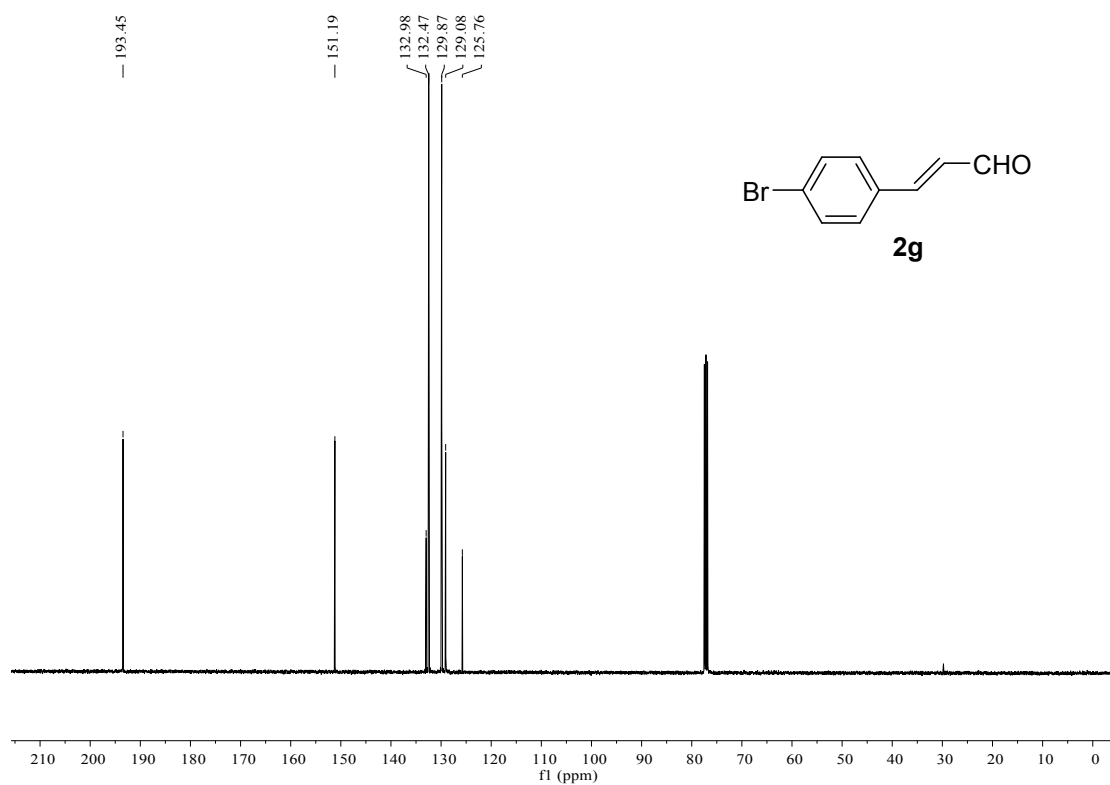

**2h: (E)-3-(naphthalen-2-yl)acrylaldehyde.**

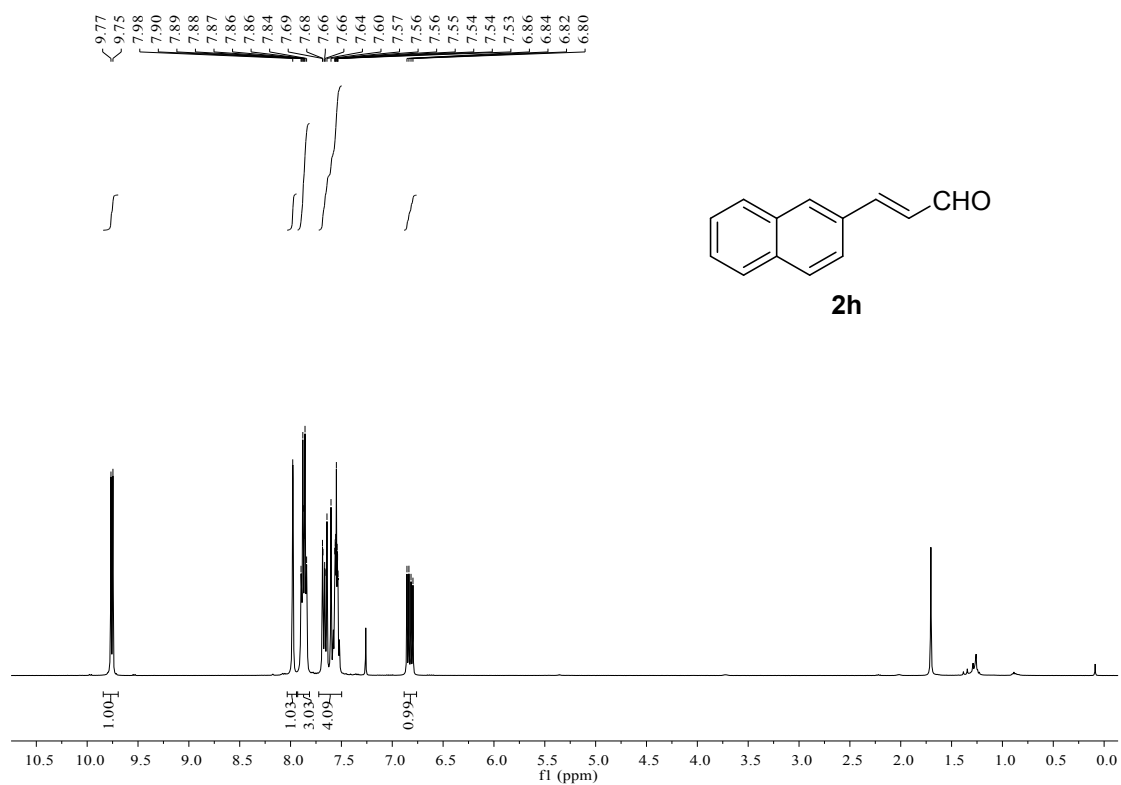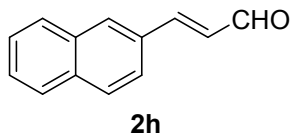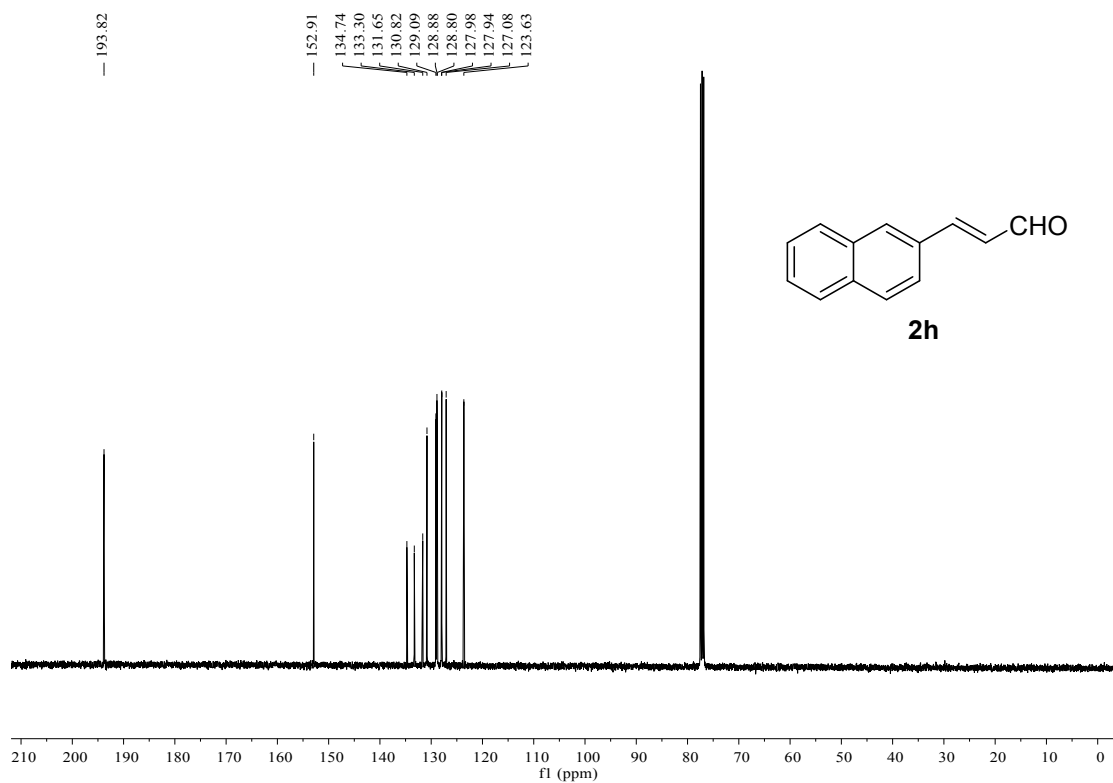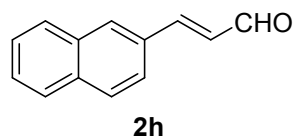

**2i: (E)-3-(naphthalen-1-yl)acrylaldehyde.**

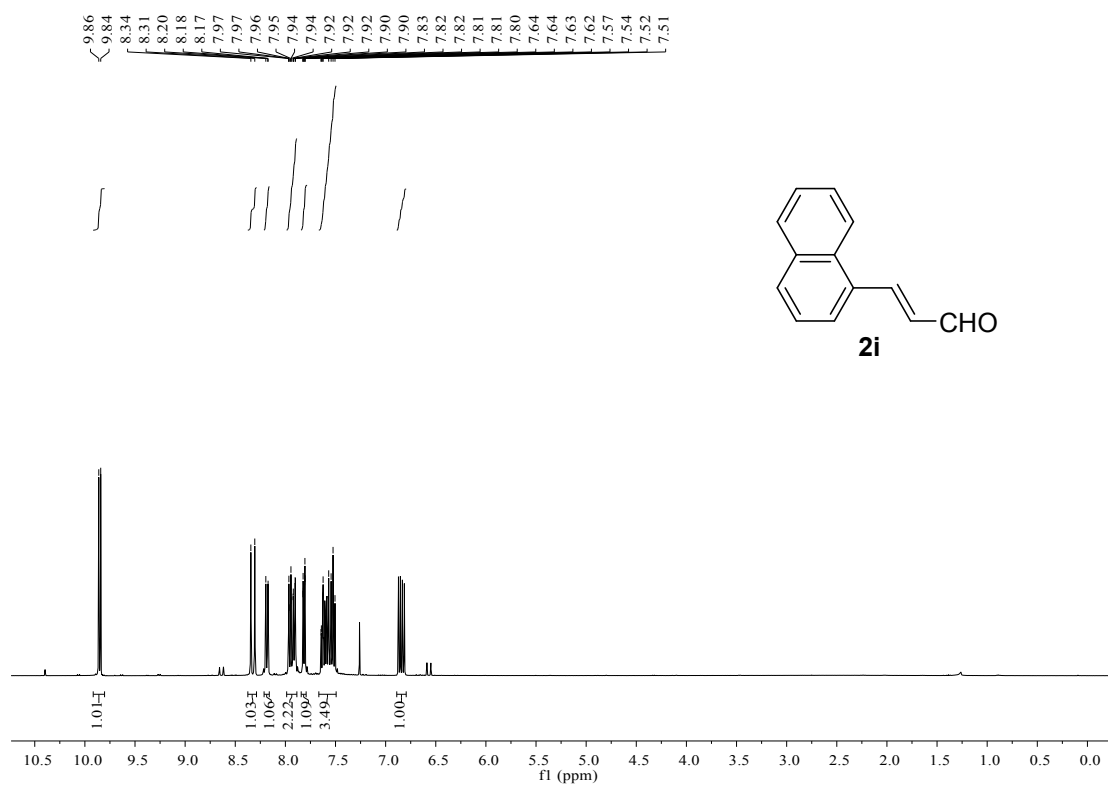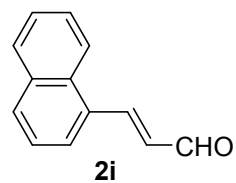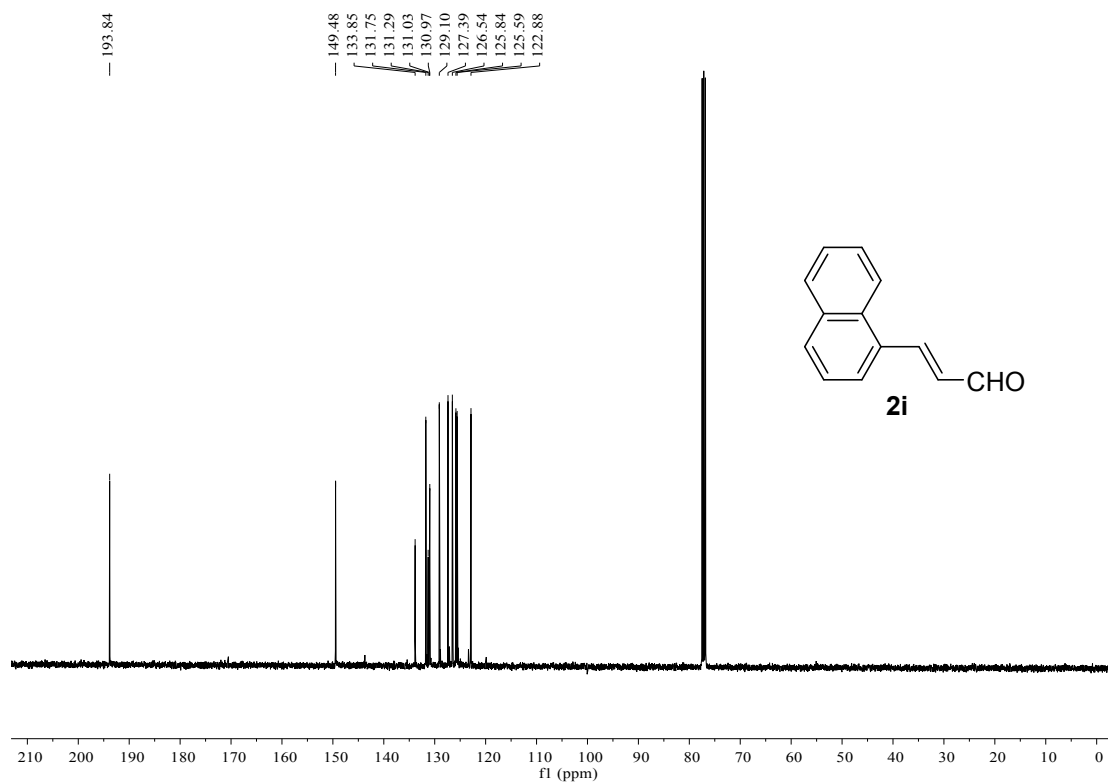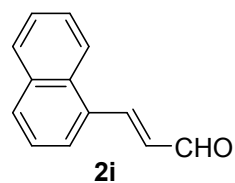

**2j: (E)-3-([1,1'-biphenyl]-4-yl)acrylaldehyde.**

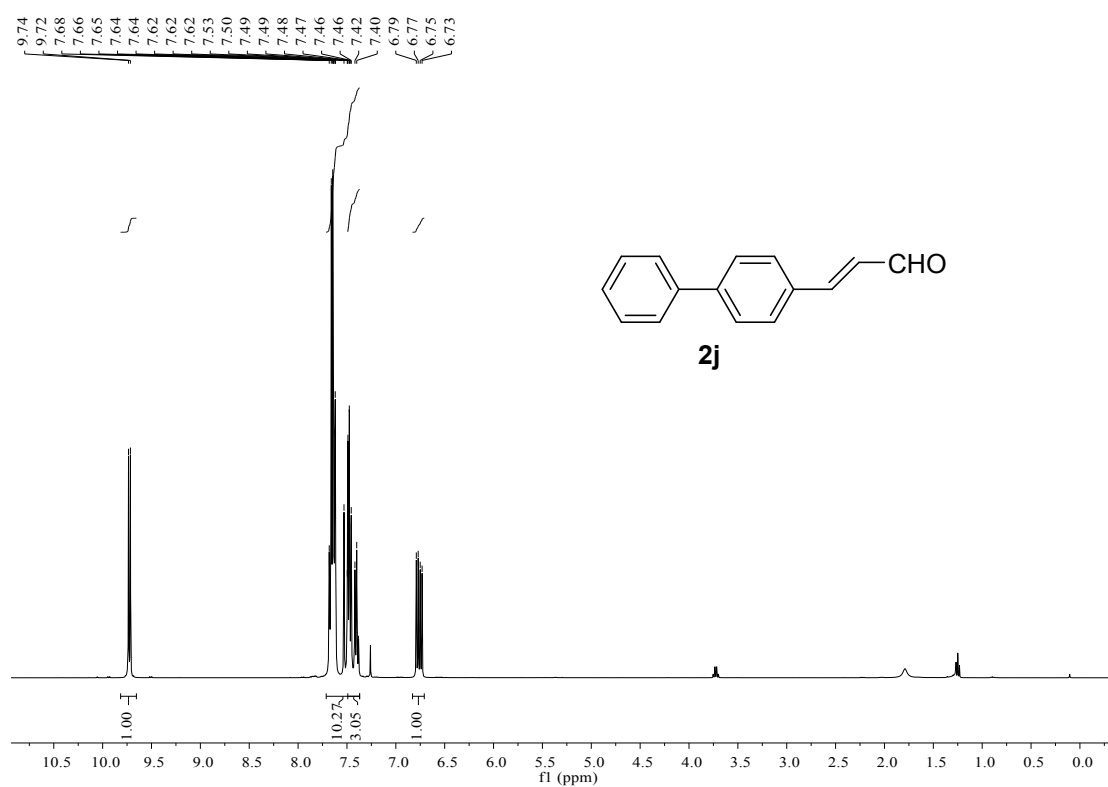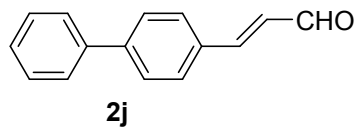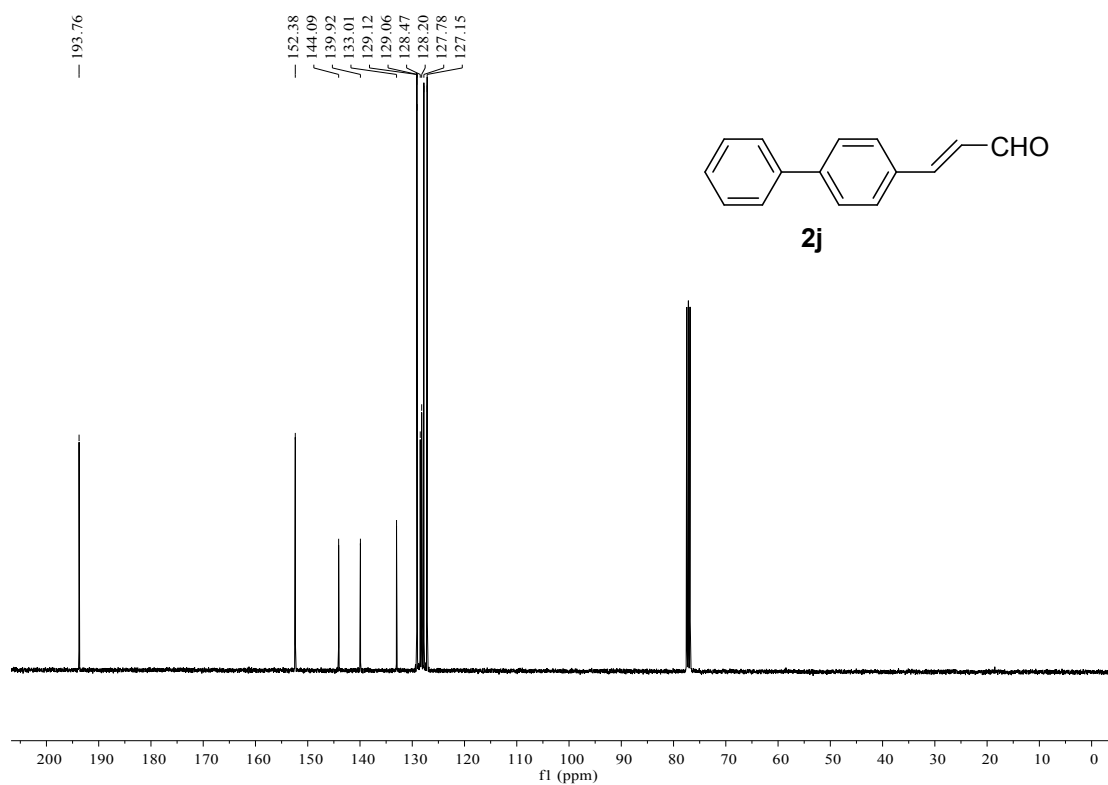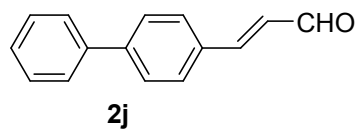

**2k: (E)-3-(4-fluorophenyl)acrylaldehyde.**

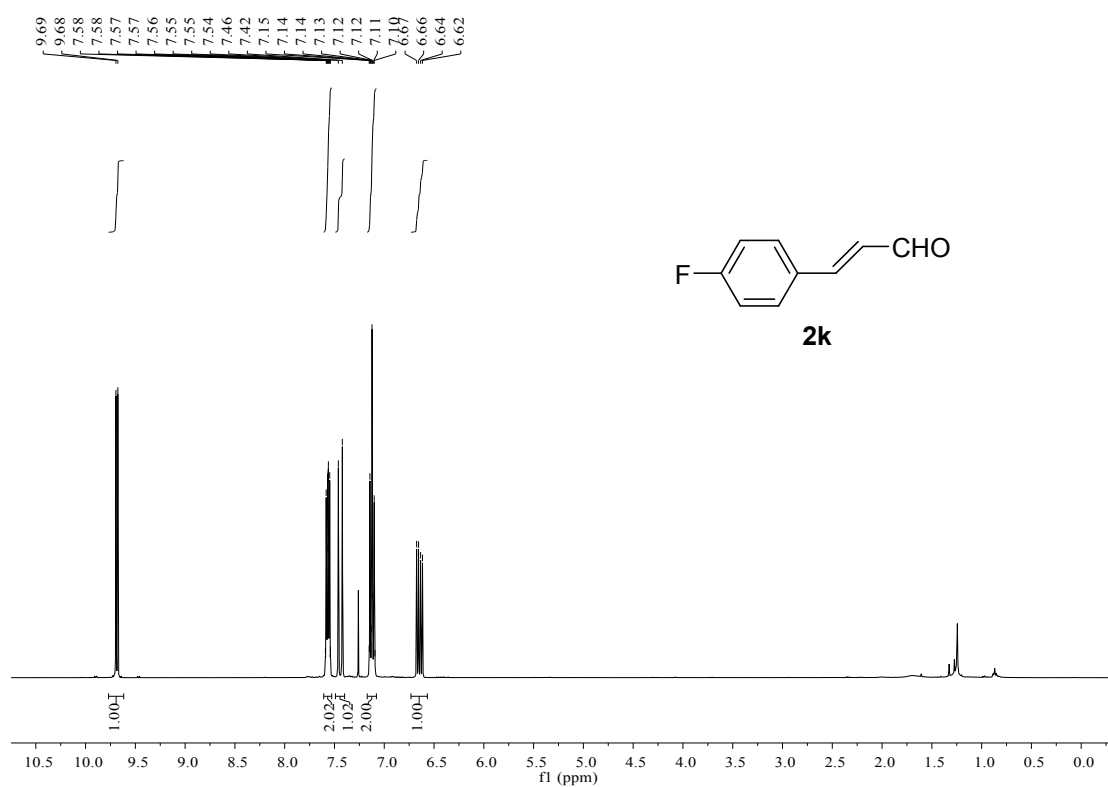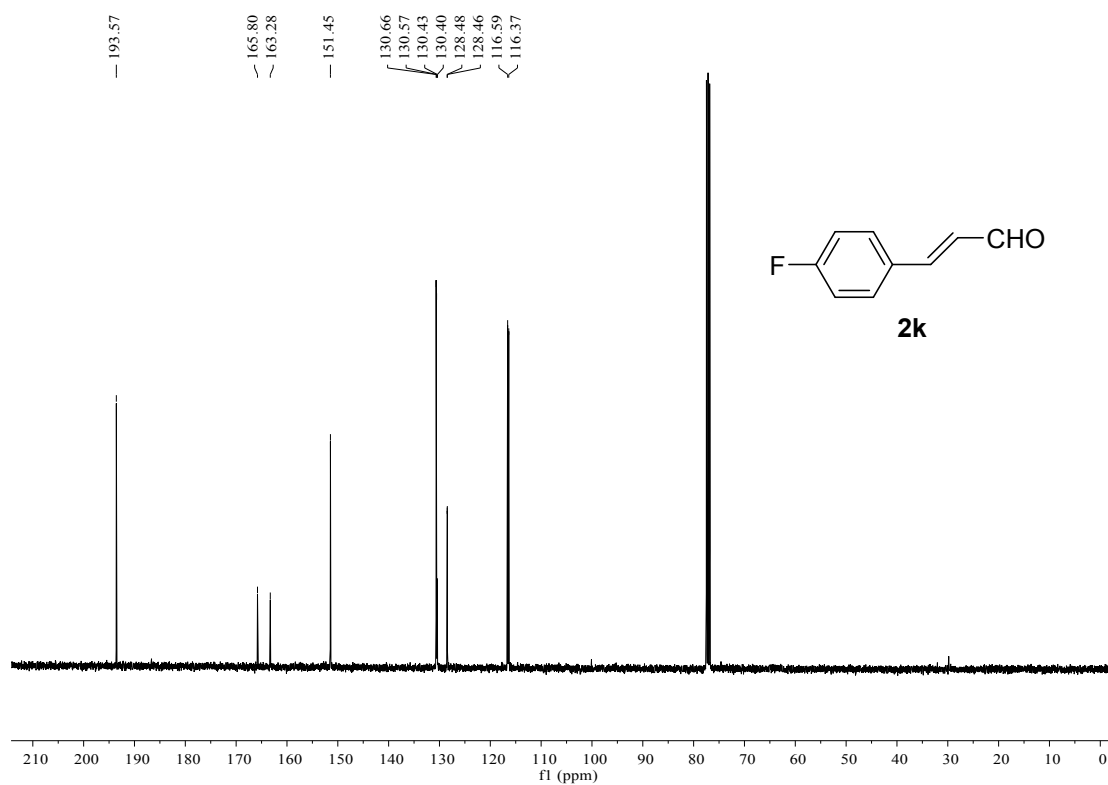

**2l: (E)-3-(4-methoxyphenyl)acrylaldehyde.**

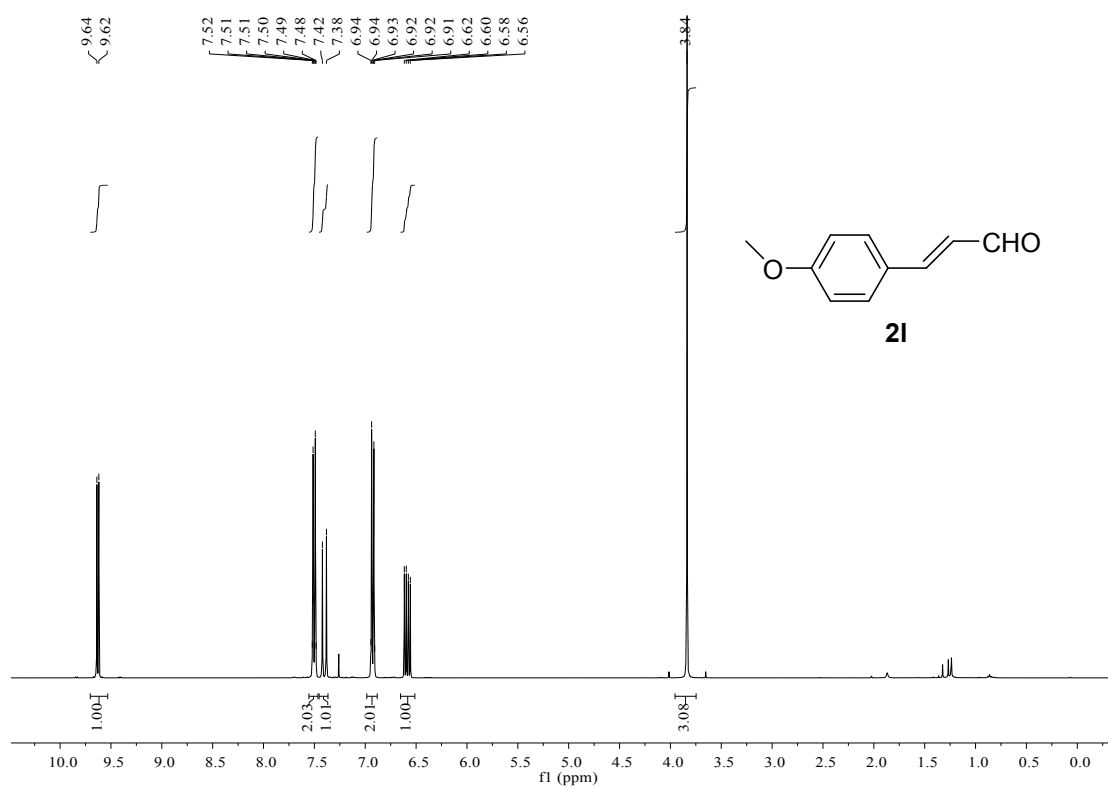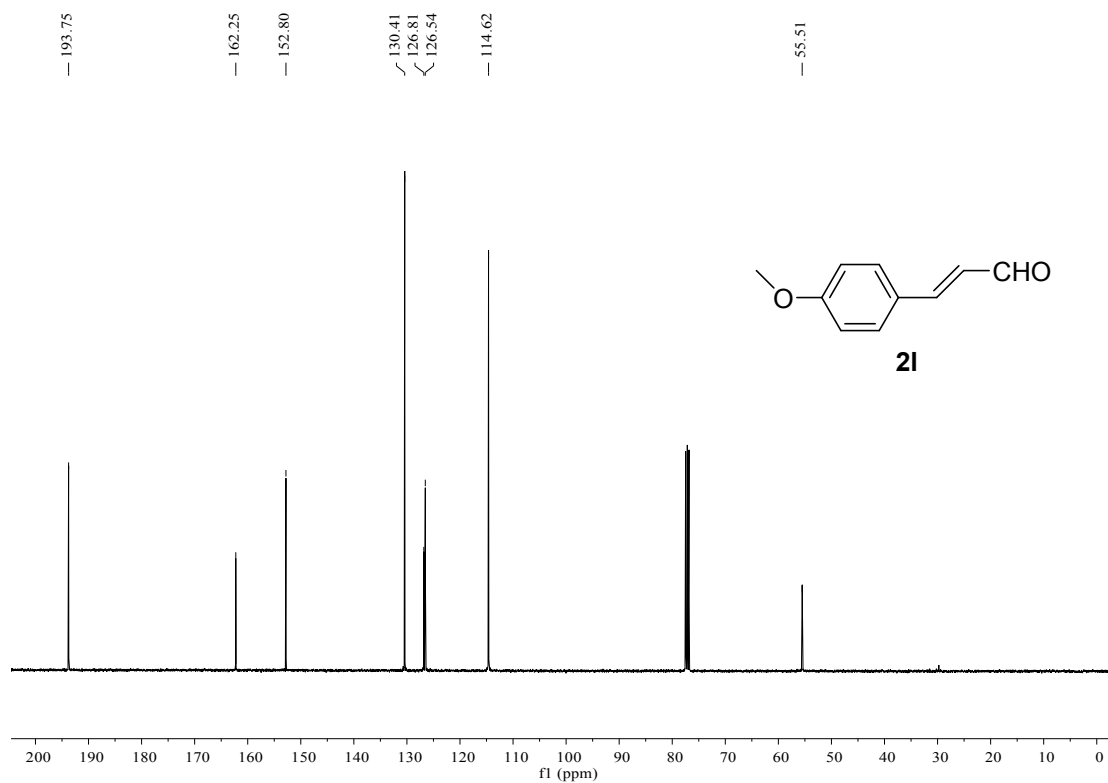

**2m: (E)-3-(2-methoxyphenyl)acrylaldehyde.**

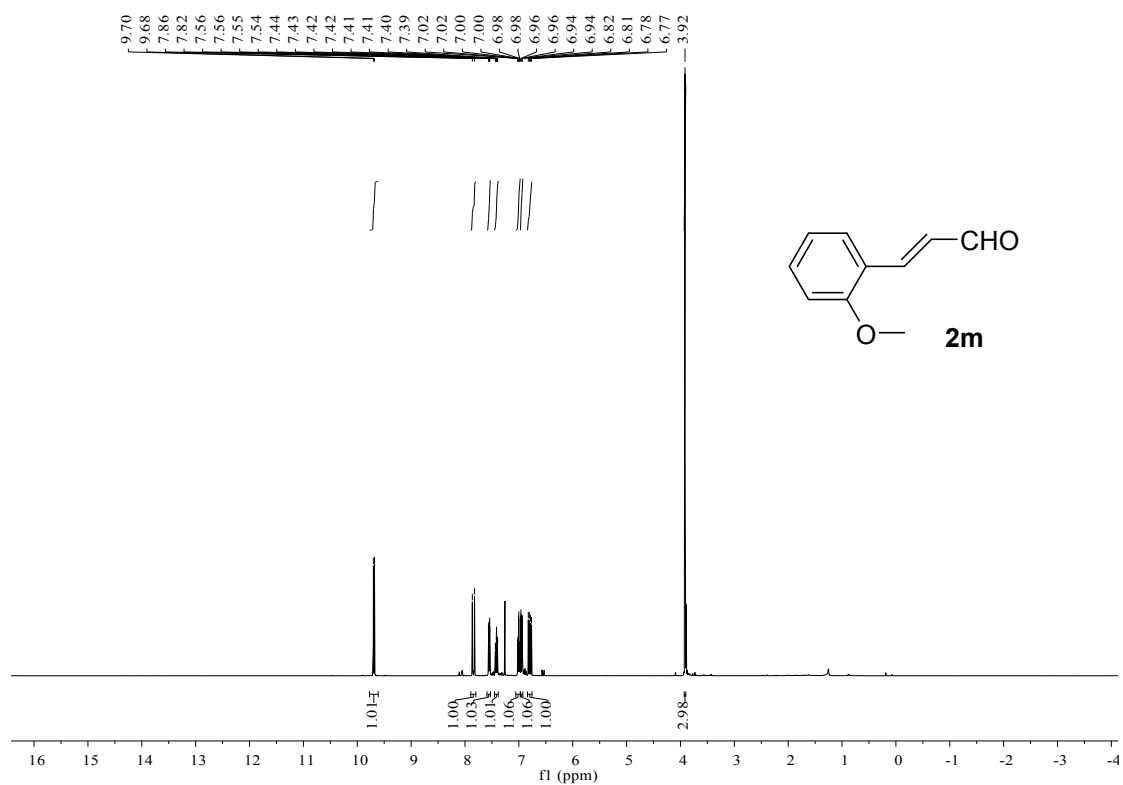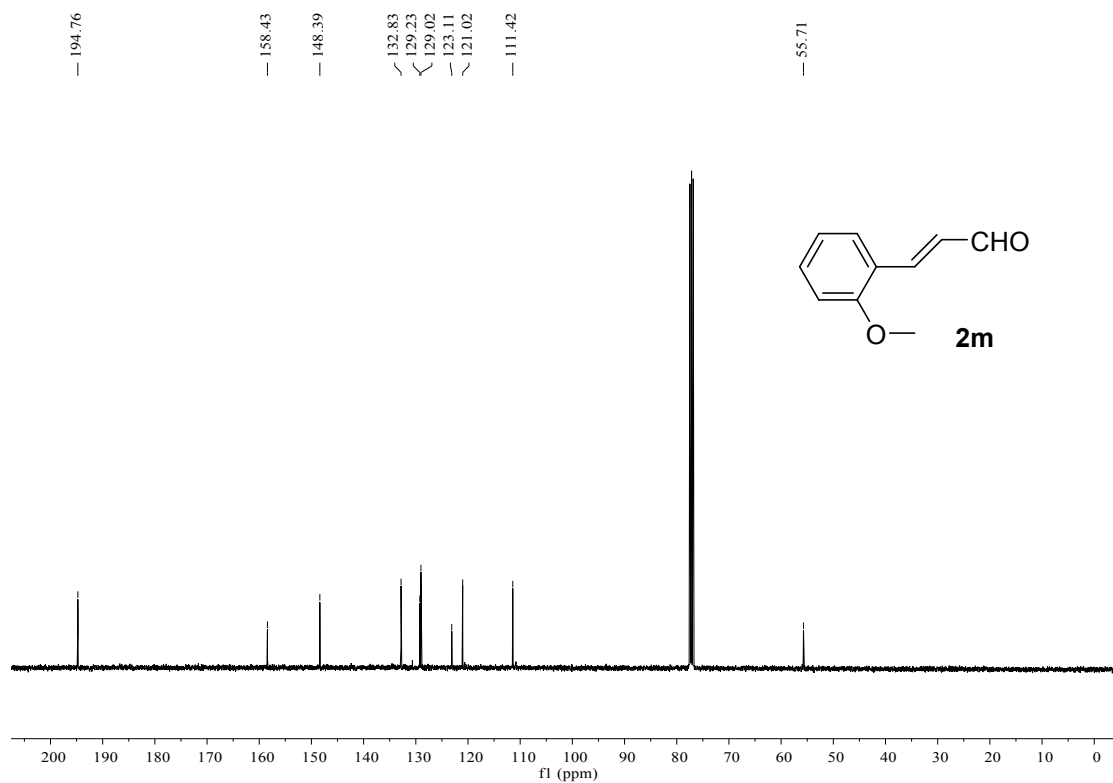

**2n: (E)-N-(3-(3-oxoprop-1-en-1-yl)phenyl)acetamide.**

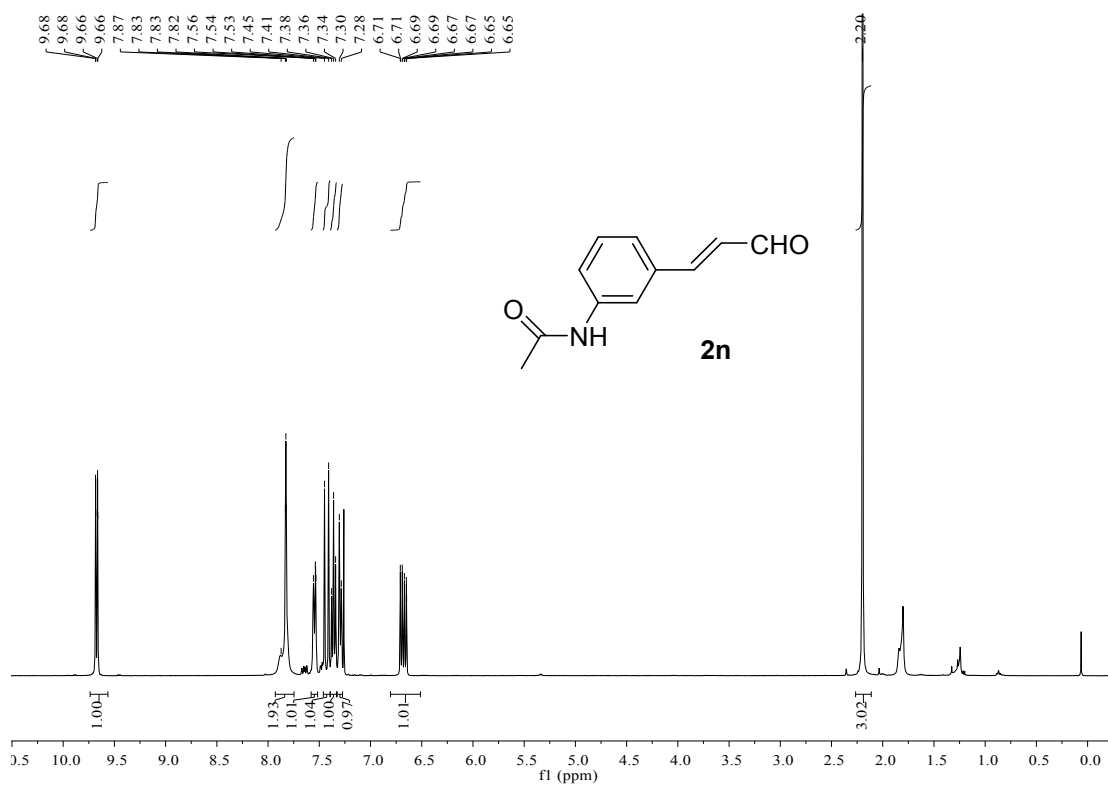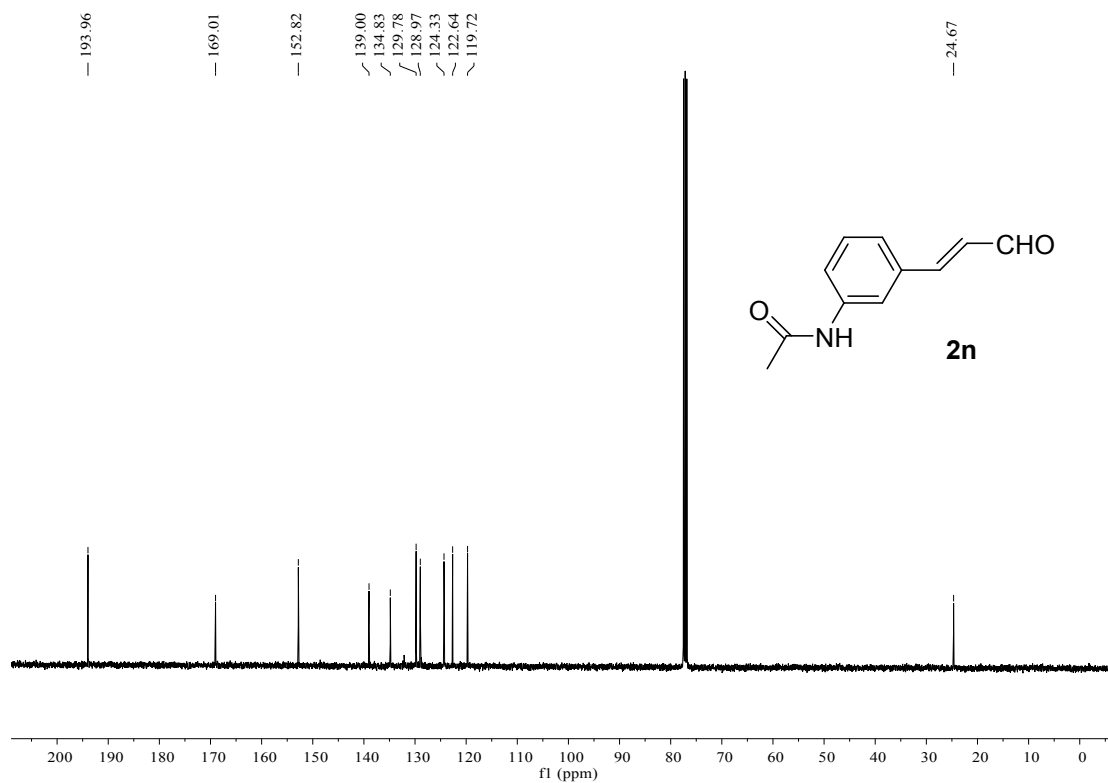



**2o: (E)-N-(4-(3-oxoprop-1-en-1-yl)phenyl)acetamide.**

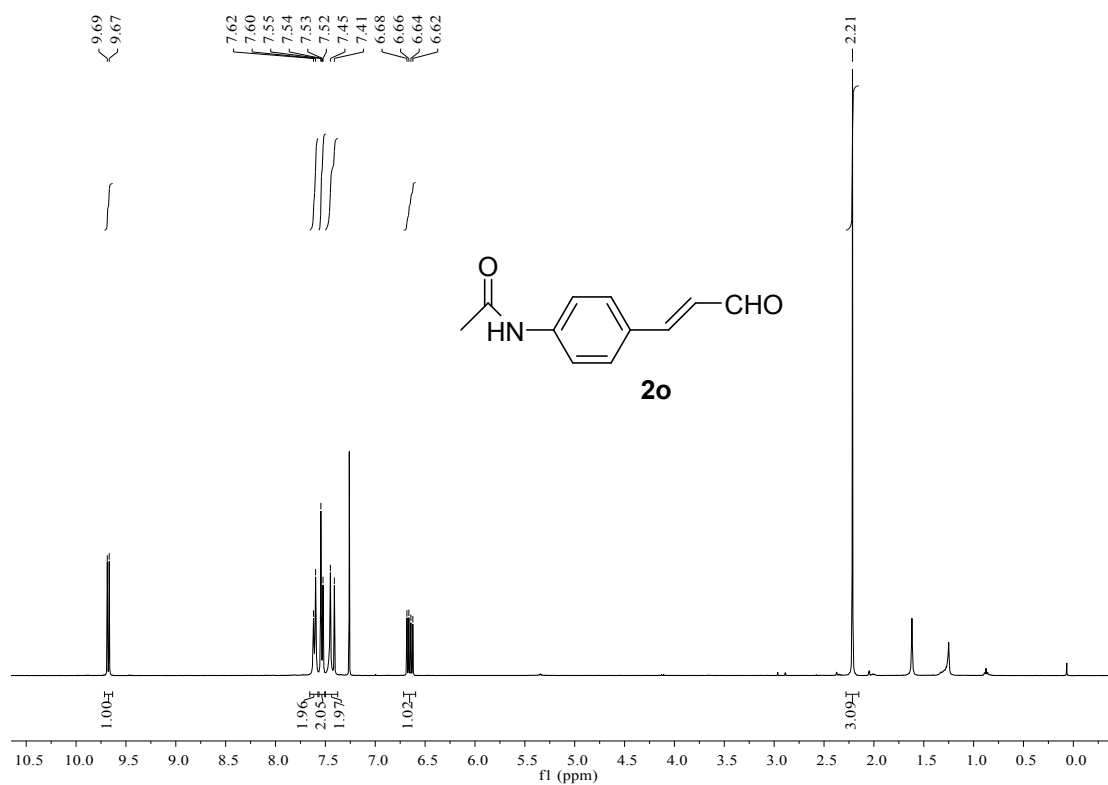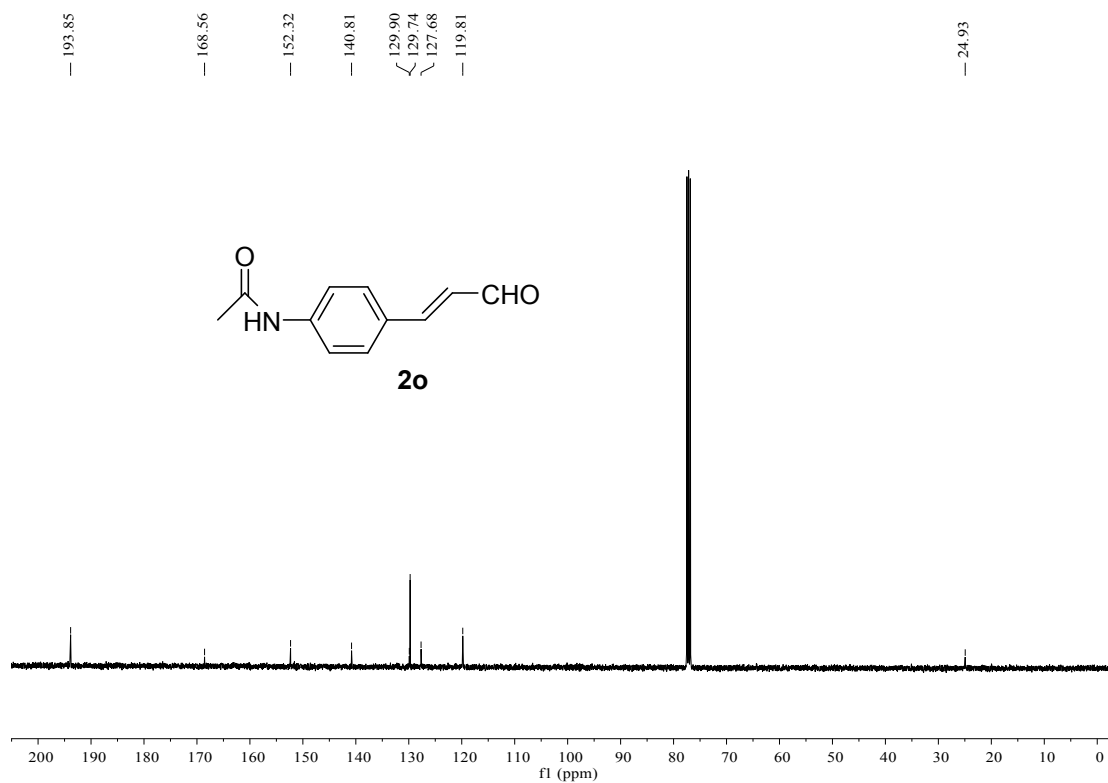

**2p: (E)-3-(4-(tert-butyl)phenyl)acrylaldehyde.**

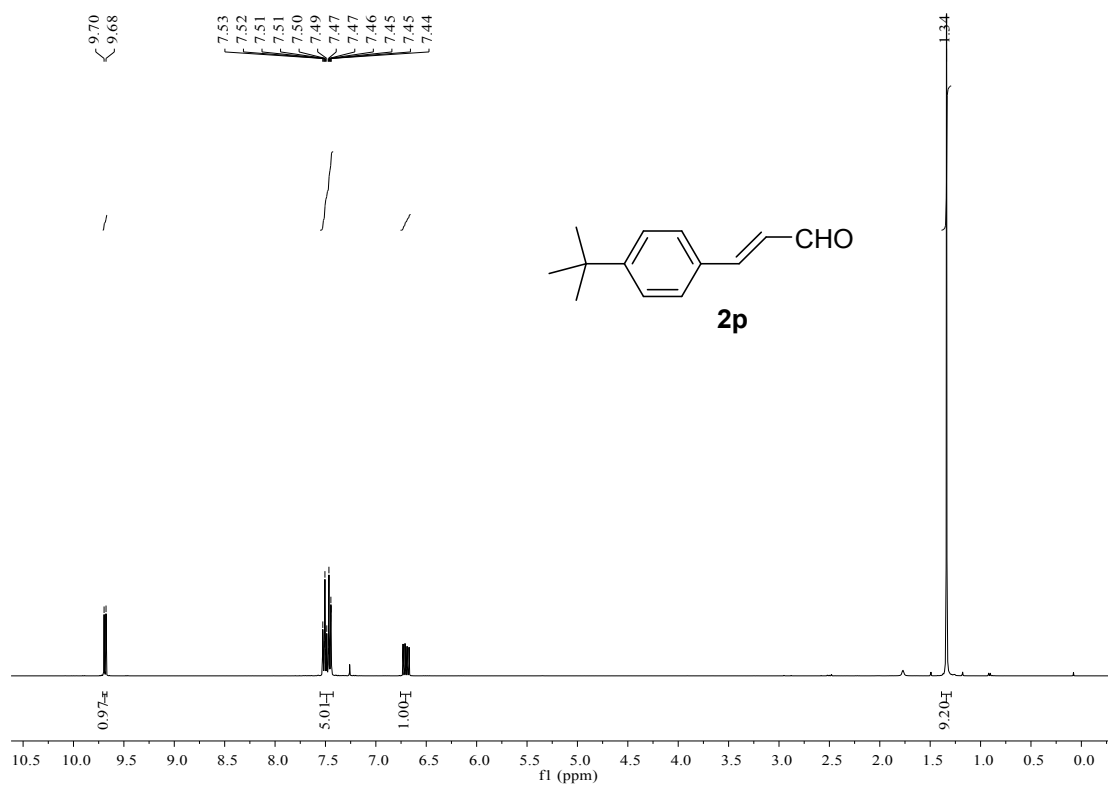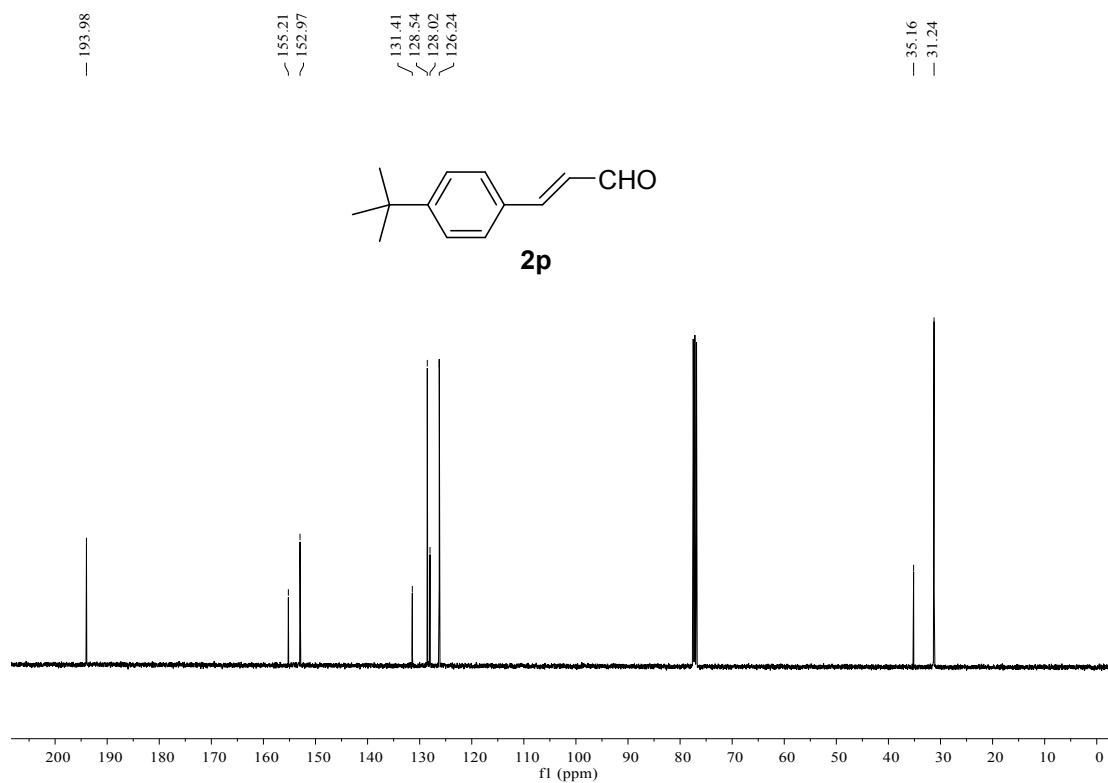

**2q: (E)-3-(5-methylthiophen-2-yl)acrylaldehyde.**

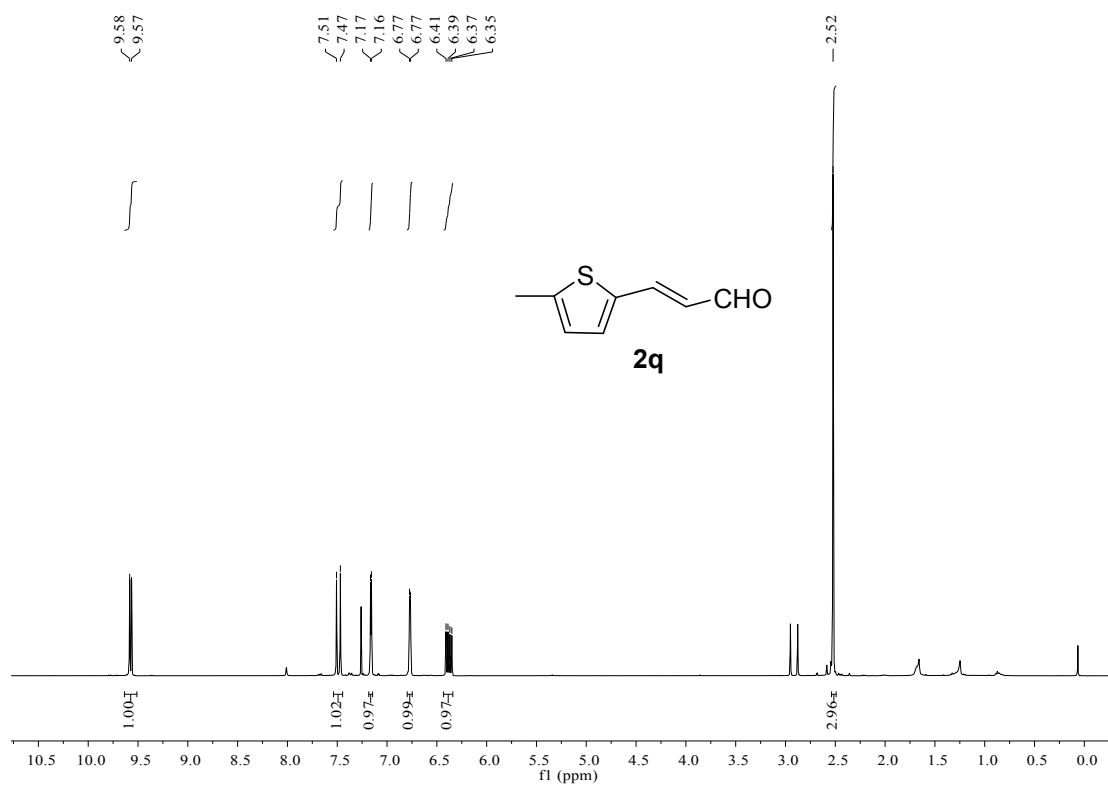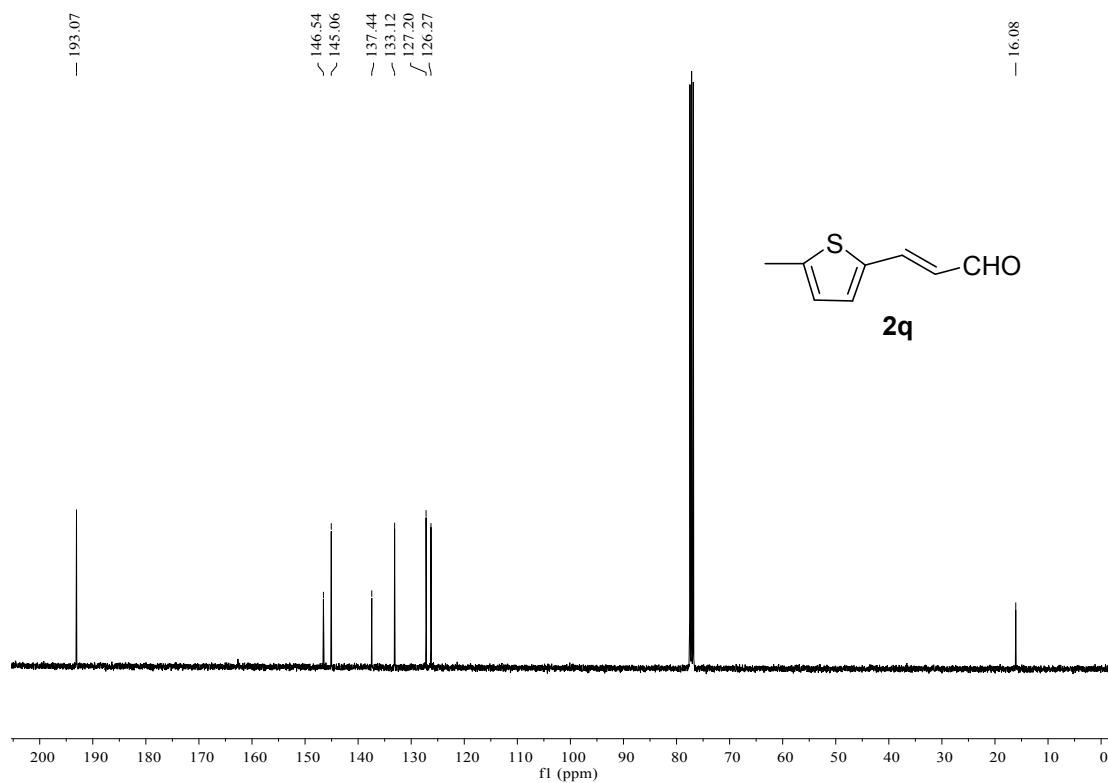

**2r: (E)-3-(3-methylthiophen-2-yl)acrylaldehyde.**

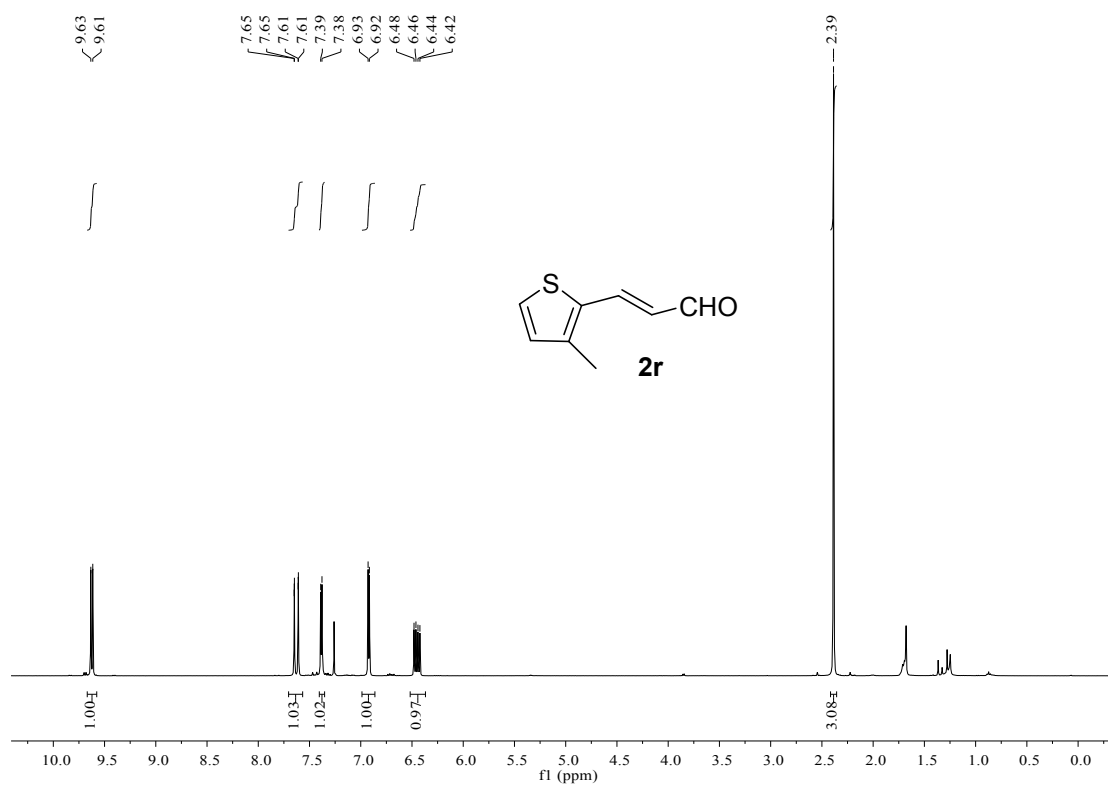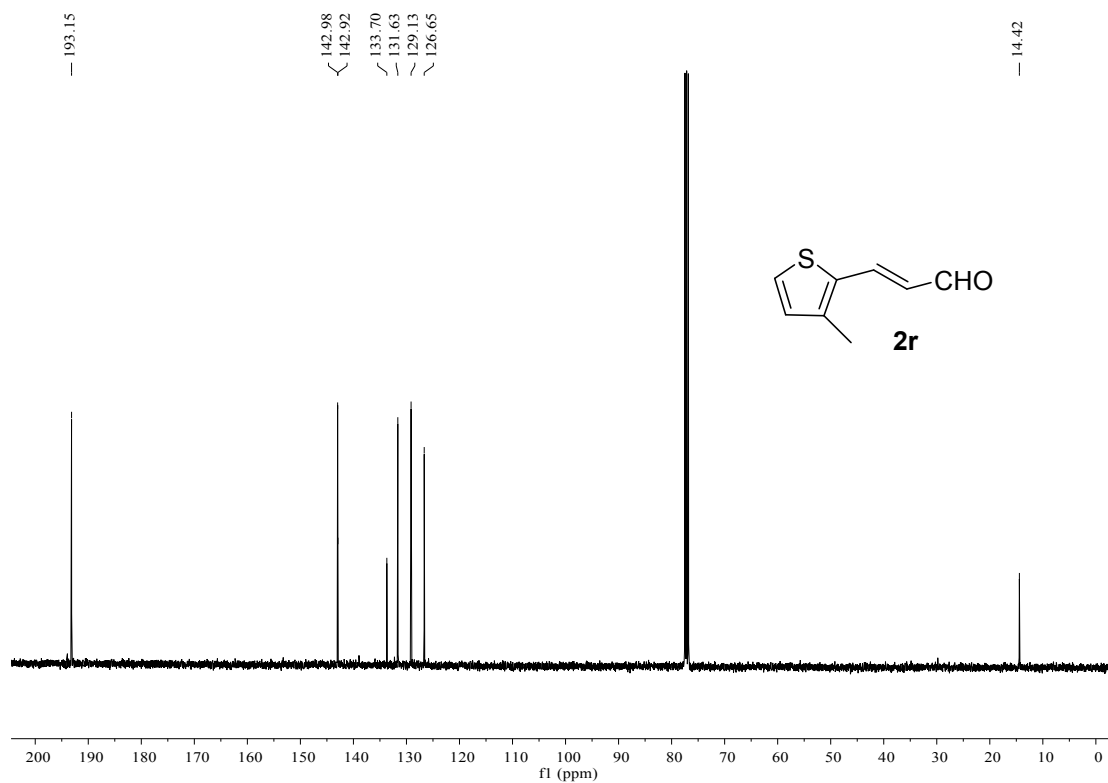

**2s: (E)-3-(4-(trifluoromethyl)phenyl)acrylaldehyde.**

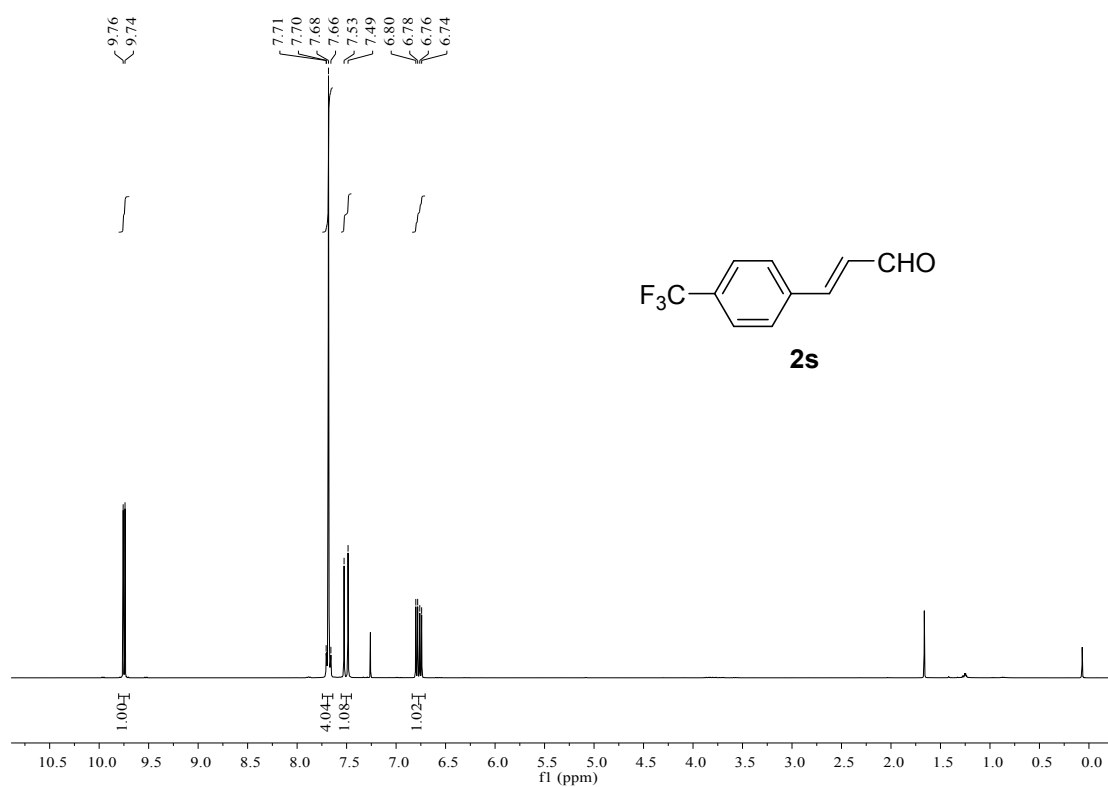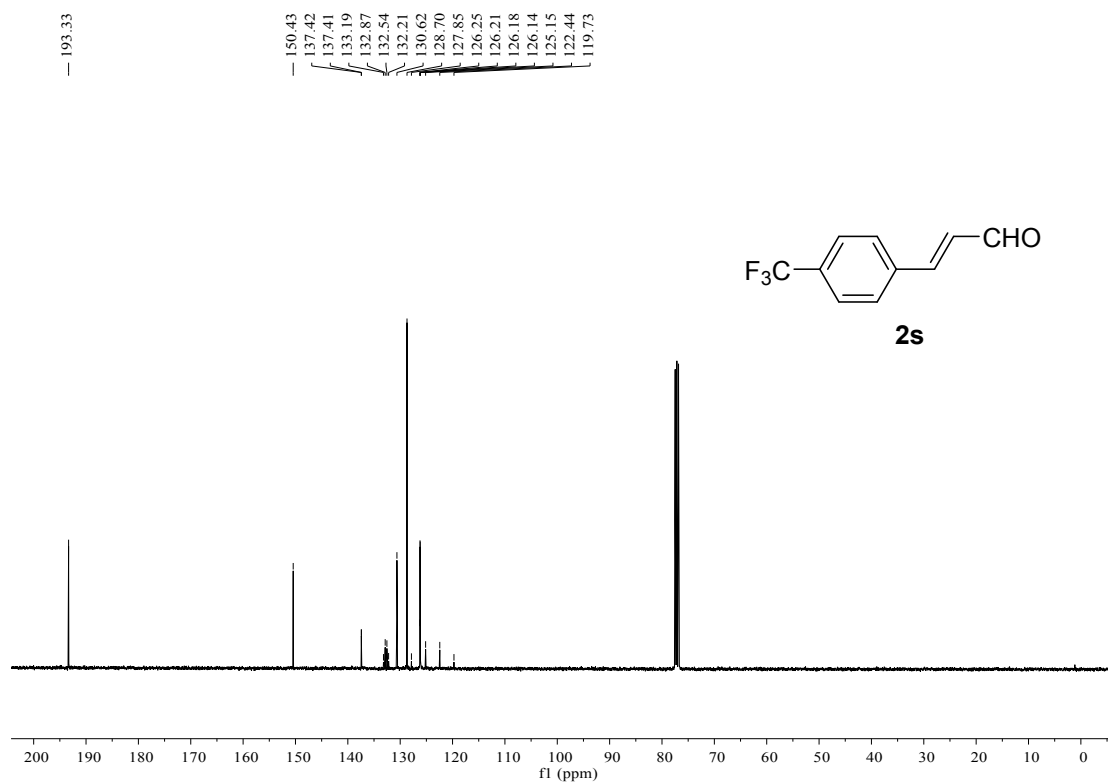

**2t: methyl (E)-4-(3-oxoprop-1-en-1-yl)benzoate.**

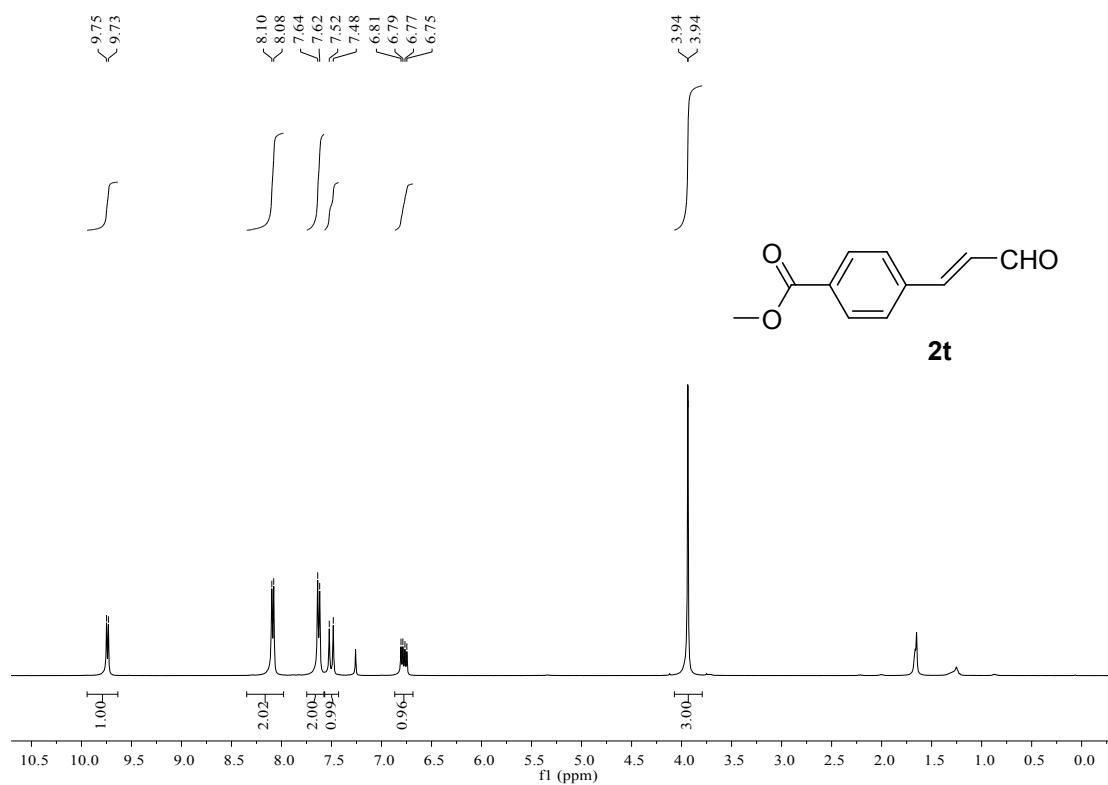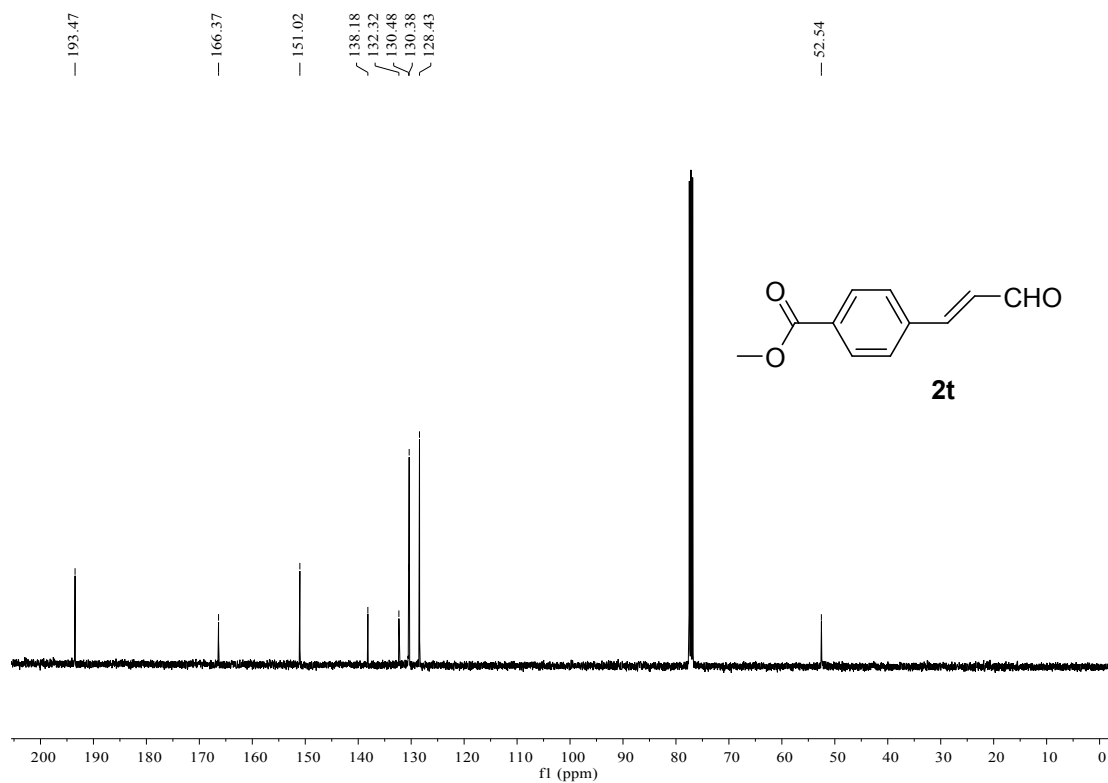

**2u: (E)-4-(3-oxoprop-1-en-1-yl)benzonitrile.**

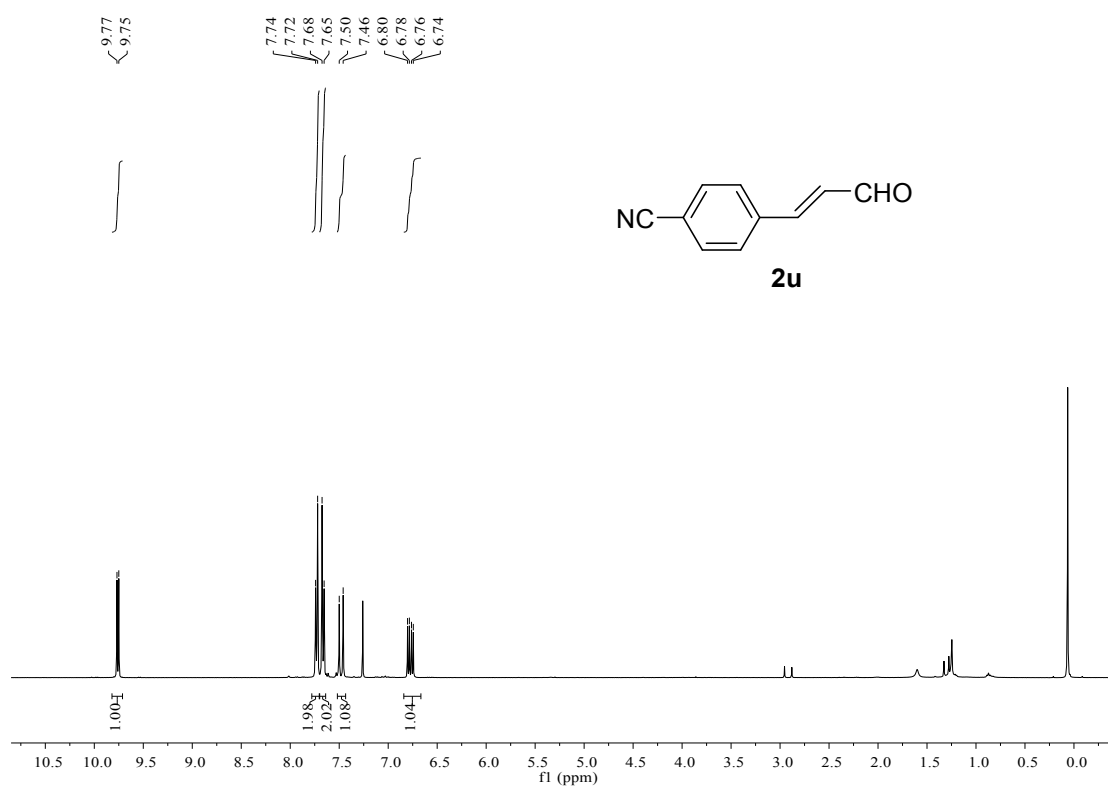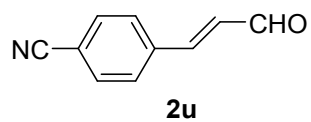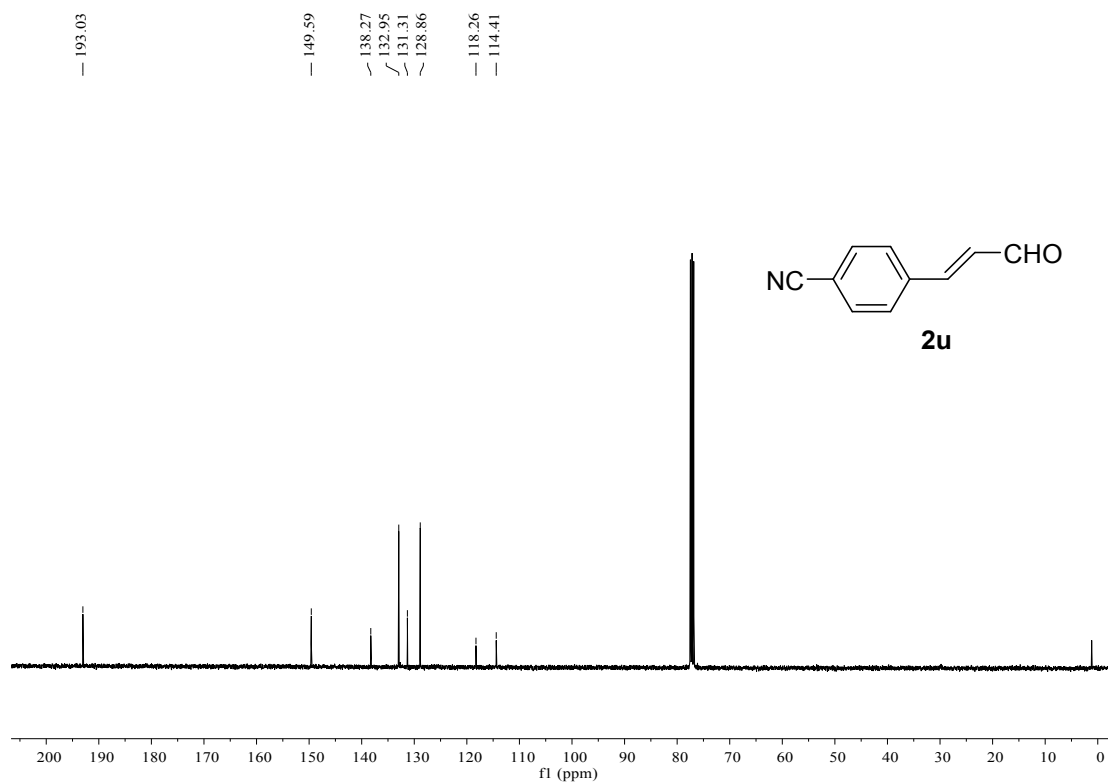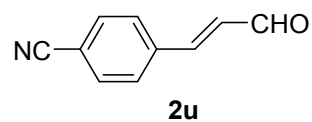

#### 4. $^1\text{H}$ NMR of Deuterium-Labeling experiments

##### Reaction A:

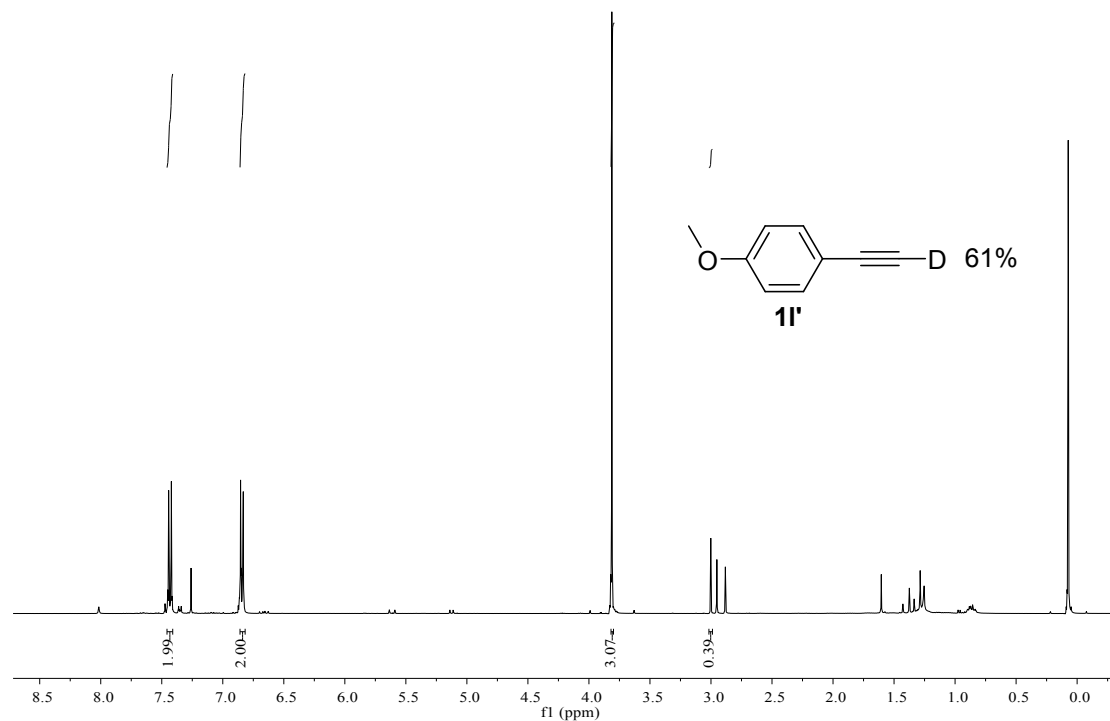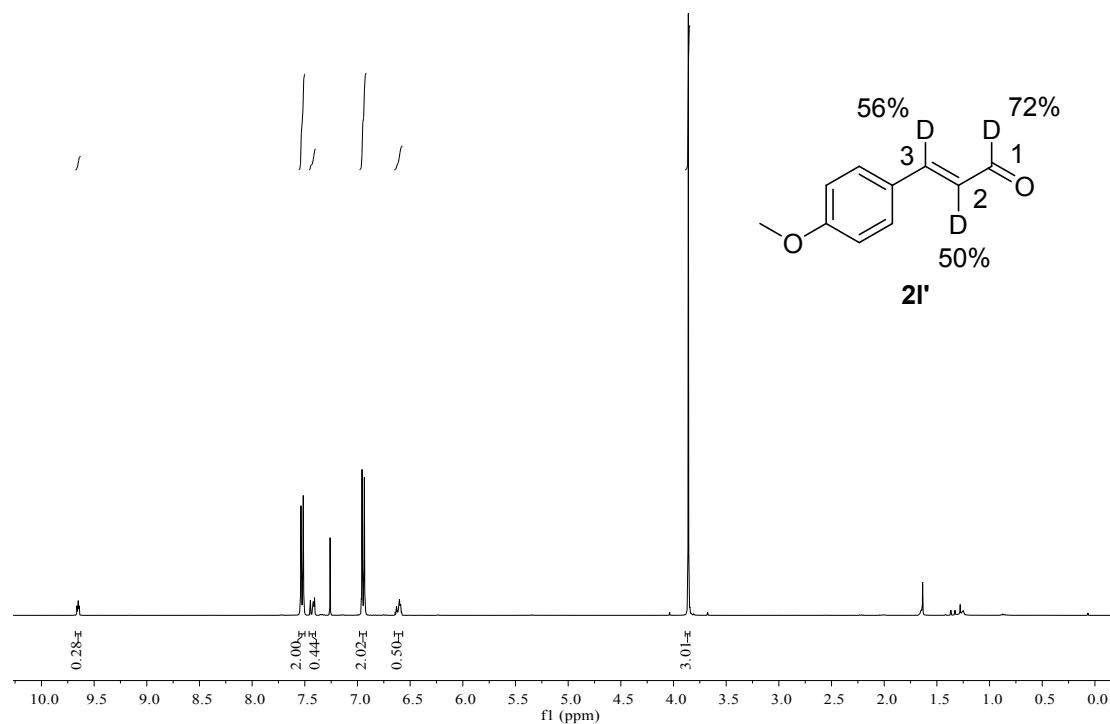



## Reaction B:

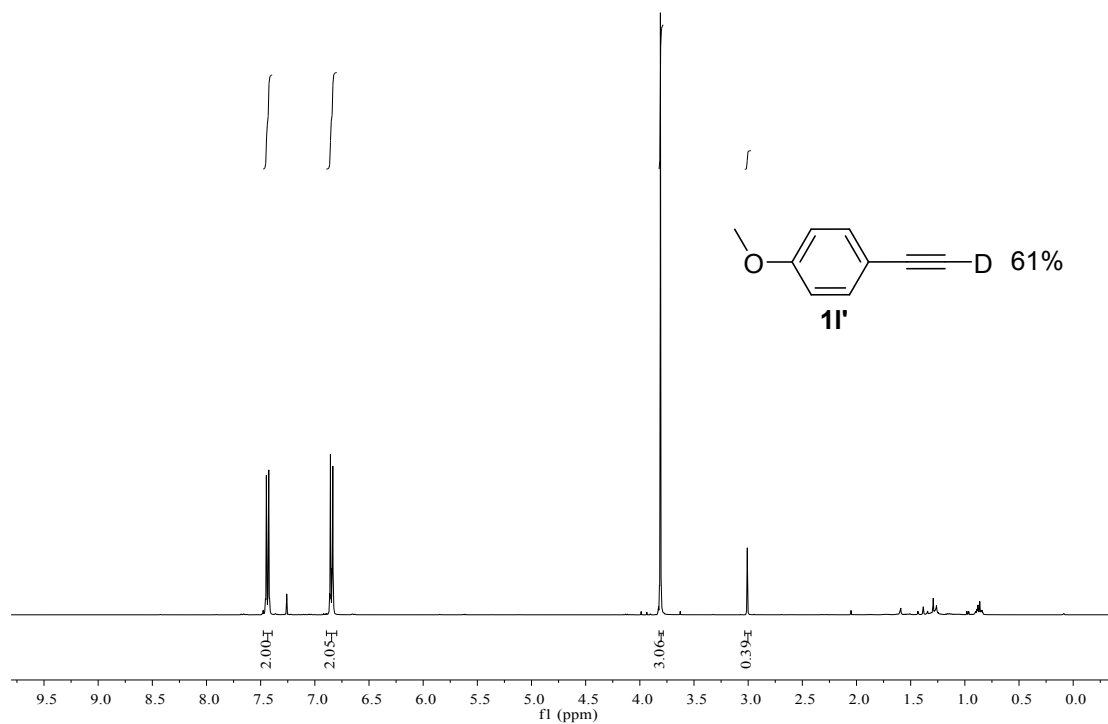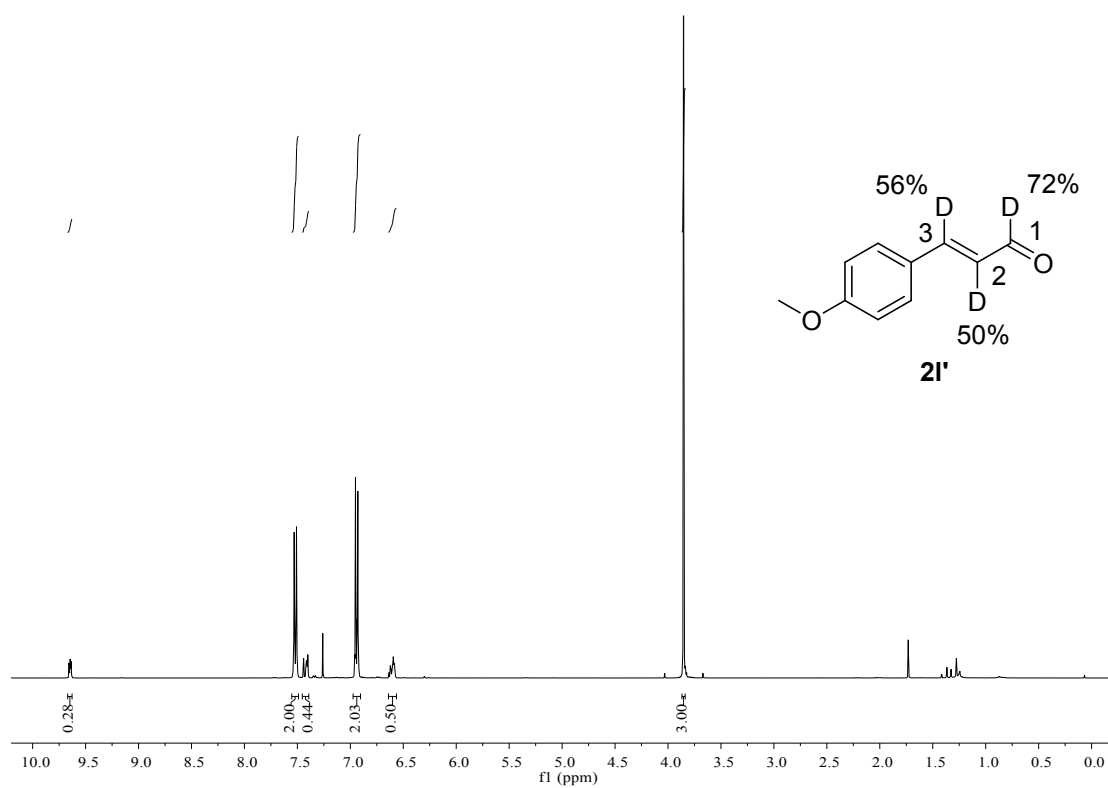

# Reaction C:

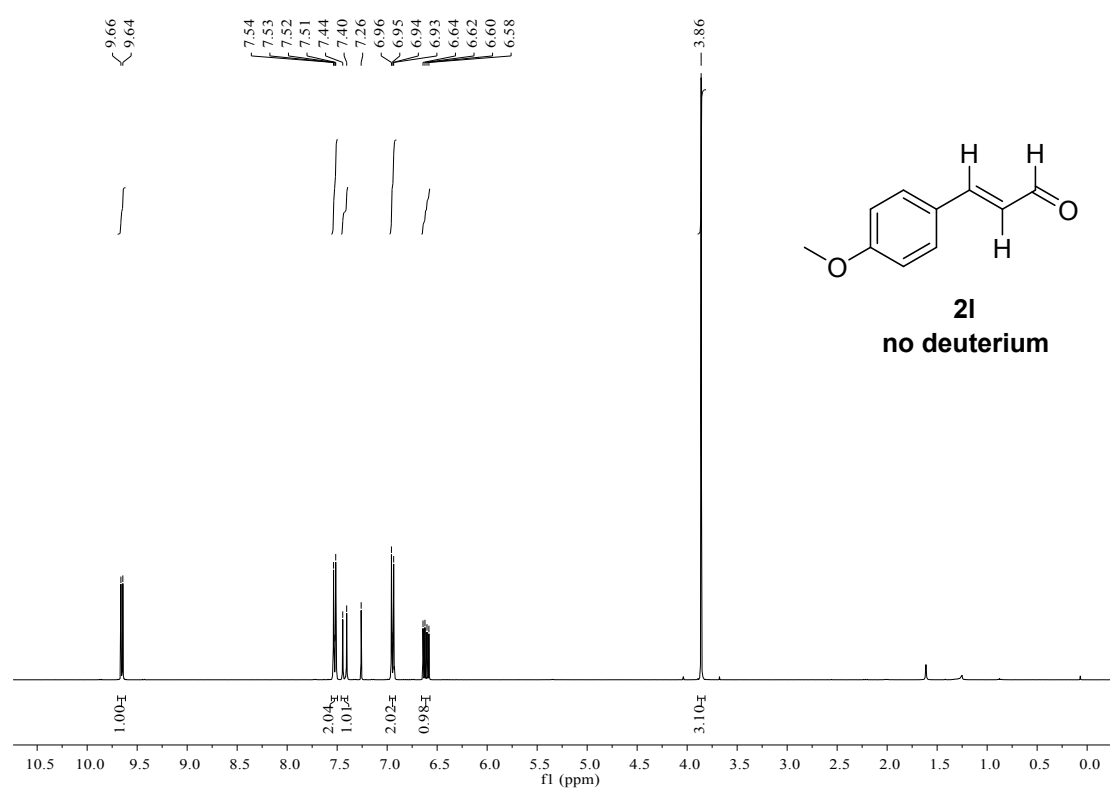

Supplement: c7cc09629a1.pdf [file c7cc09629a1.pdf]
